# Supplementary material
Source: PubMed Central journal article supplement (PMC3939878)
Supplement: 1315792111_sapp.pdf [file 1315792111_sapp.pdf]

## Supporting Information Appendix

**Secretory Antibodies in Breast Milk Promote Long-Term Intestinal Homeostasis by Regulating the Gut Microbiota and Host Gene Expression.** Eric W. Rogier, Aubrey L. Frantz, Maria E.C. Bruno, Leia Wedlund, Donald A. Cohen, Arnold J. Stromberg, Charlotte S. Kaetzel.

### Supplementary Methods:

**Tissue histology and immunofluorescence microscopy (Figs. S1, S2, S3, S10).** Mouse tissues were dissected at various time points as noted in the figures. Tissues were fixed in buffered formalin (Sigma-Aldrich, St. Louis, MO), embedded in paraffin and sectioned. Serial sections were stained with hematoxylin and eosin or by immunofluorescence for pIgR/SC and IgA as described (1).

**Quantification of IgA in mouse milk and stomach contents (Fig. S1).** Milk was collected from nursing dams as described (2) at the indicated times postpartum. For analysis of stomach contents, suckling mice were sacrificed at 10 days of age, stomachs were dissected, the entire contents were removed by gentle scraping, weighed and resuspended in 1mL sample buffer for enzyme-linked immunosorbent assay (ELISA) (50 mM Tris, pH 7.4, 0.14 M NaCl, 1% bovine serum albumin, 0.05% Tween 20). ELISA sample buffer. All samples were stored at -20°C until analysis. Total IgA was quantified by ELISA as described (3). Total protein was quantified in milk samples by the Pierce BCA Protein Assay (ThermoFisher Scientific, Rockford, IL).

**Imaging of colonic bacteria by fluorescence *in situ* hybridization (FISH) (Fig. S3).** Colons were harvested from mice at the indicated ages and fixed in Carnoy's fixative (60% ethanol, 30% chloroform, 10% acetic acid), embedded in paraffin and sectioned. After rehydration, tissue sections were hybridized with a universal 16S rRNA probe (EUB338) (4) at a concentration of 10ng/μL as previously described (5). The EUB338 probe, which was labeled on the 5' end with the AlexaFluor647 fluorophore and purified by high performance liquid chromatography agarose gel electrophoresis, was obtained from Invitrogen (Carlsbad, CA). Tissue sections were counterstained with DAPI to visualize eukaryotic cell nuclei.

**Identification of bacterial species in mesenteric lymph nodes (Fig. S4).** MLNs were homogenized and cultured as described for Fig. 2 of the main text. Representative colonies from two different 21 day-old offspring of *Pigr*<sup>-/-</sup> dams were cultured for four days under aerobic conditions at 37°C in Schaedler broth. Bacteria were collected by centrifugation, and DNA was extracted by column purification with the QIAmp DNA Stool Mini Kit (Qiagen Inc., Valencia CA). The bacterial 16S rRNA gene was amplified by real-time PCR using universal EUB338/EUB518R primers (6) as previously described (3). The PCR product was isolated by agarose gel electrophoresis, excised, and purified using the QIAEX II gel Extraction Kit (Qiagen). Purified DNA was ligated into the pGEM-T vector (Promega, Madison, WI), then used to transform frozen competent *E. coli* DH5α (Promega) to ampicillin resistance by standard protocols. Two ampicillin-resistant colonies were harvested and cultured in Schaedler broth containing 100μg/mL ampicillin. Plasmid DNA was purified using the QIAprep Spin Miniprep Kit (Qiagen), and shipped on ice to ACGT, Inc. (Wheeling, IL) for sequence analysis. 16S rRNA sequences were compared with the sequences of known bacterial genomes by BLAST analysis through the National Center for Biotechnology Information database (<http://blast.ncbi.nlm.nih.gov/Blast>). The highest alignment score (99.8% identity) was observed by comparison to the 16S rRNA gene from *Ochrobactrum anthropi*. The relative abundance of *O. anthropi* in fecal samples was based on hybridization values from the PhyloChip™ analysis as described in the main text, calculated as a trimmed average of fluorescence intensity with maximum and minimum values removed before averaging. Scores are expressed as log<sub>2</sub> (hybridization value) x1000, meaning that a difference of 1000 units corresponds to a two-fold difference in abundance.

**Quantitative real-time PCR analysis of fecal bacteria (Fig. S5).** DNA was isolated from freshly collected stools using the QIAmp DNA Stool Mini Kit (Qiagen) and stored at -20°C until analysis. Bacterial 16S rRNA genes were amplified by real-time PCR using universal EUB338/EUB518R primers (6) as previously described (3). To quantify total numbers of bacteria (Fig. S5A), C<sub>T</sub> values from individual samples were compared to regression lines of C<sub>T</sub> values generated using defined quantities of bacterial DNA from representative species

from the four major phyla of colonic bacteria: Firmicutes, *Lactobacillus acidophilus*; Bacteroidetes, *Bacteroides thetaiotaomicron*; Proteobacteria, *Escherichia coli*; Actinobacteria, *Bifidobacterium longum*. For approximation of the relative proportion of each phylum in the fecal microbiota over time (Fig. S5D), phyla-specific primers were all divided by the total Eub C<sub>T</sub> with primers for Firmicutes (Firm934F/Firm1060R) (6), Bacteroidetes (Bact934F/Bact1060R, 0.21 μM) (6), Proteobacteria (Eub338F, 0.1 μM, Bet680, 5 μM) (7), and Actinobacteria (Actino235F, 5 μM, Eub518R, 0.1 μM) (7).

**Analysis of gene expression in colonic epithelial cells (Figs. S7, S8, S9).** ECs were isolated and purified from mouse colons as described in the main text. RNA was isolated using the MagNA Pure Compact RNA Isolation Kit and automated LightCycler System (Roche Applied Science, Indianapolis, IN). RNA concentration and purity were analyzed using the Agilent 2100 Expert Eukaryotic Total RNA Nanodrop System (Agilent Technologies, Santa Clara, CA). Only samples with an RNA Integrity Number of 8.5 or greater were used for microarray analysis. Two independent pooled RNA samples were made from each treatment group of 6 mice, by combining equal amounts of RNA from 3 individual mice, thereby generating RNA samples for 16 microarray chips (8 treatment groups, 2 independent chips per group). An aliquot of 250 ng of RNA from each pool was used to generate reverse-transcribed cDNA, of which 2 μg were hybridized to each microarray chip. Samples were analyzed at the University of Kentucky Microarray Core Facility using the GeneChip Whole Transcript Sense Target Labeling Assay protocol and GeneChip Mouse Gene 1.0 ST arrays (Affymetrix, Santa Clara, CA). Hybridization signals were annotated with gene symbol and functional information. Probe level data were produced using Affymetrix Expression Console with the RMA output option. Probe sets were retained for analysis if they had gene symbol level annotations. Statistical modeling and data analysis was performed using a 2 x 2 x 2 ANOVA model-based approach. This analysis produced a list of genes that were regulated to a highly significant degree ( $P < 0.01$ ) in colonic ECs by passive SIgA, active SIgA, DSS, or a combination of these factors (Fig. S7 and Table S1). The abundance of mRNA transcripts for 16 selected genes was validated by analyzing RNA from individual mice, using aliquots of the same RNA samples that had previously been used for the microarray analysis. Transcript levels were quantified by Nanostring nCounter™ hybridization (8), and normalized to hybridization signals for 6 “housekeeping” genes using an algorithm developed by NanoString Technologies (Seattle, WA) ([www.nanostring.com](http://www.nanostring.com)).

1. Frantz AL, Bruno ME, Rogier EW, Tuna H, Cohen DA, Bondada S, Chelvarajan RL, Brandon JA, Jennings CD, Kaetzel CS (2012) Multifactorial patterns of gene expression in colonic epithelial cells predict disease phenotypes in experimental colitis. *Inflamm Bowel Dis* 18:2138-2148.
2. Garvy BA, Harmsen AG (1996) Susceptibility to *Pneumocystis carinii* infection: host responses of neonatal mice from immune or naive mothers and of immune or naive adults. *Infect Immun* 64:3987-3992.
3. Frantz AL, Rogier EW, Weber CR, Shen L, Cohen DA, Fenton LA, Bruno ME, Kaetzel CS (2012) Targeted deletion of MyD88 in intestinal epithelial cells results in compromised antibacterial immunity associated with downregulation of polymeric immunoglobulin receptor, mucin-2, and antibacterial peptides. *Mucosal Immunol* 5:501-512.
4. Johansson ME, Phillipson M, Petersson J, Velcich A, Holm L, Hansson GC (2008) The inner of the two Muc2 mucin-dependent mucus layers in colon is devoid of bacteria. *Proc Natl Acad Sci U S A* 105:15064-15069.
5. Amann RI, Binder BJ, Olson RJ, Chisholm SW, Devereux R, Stahl DA (1990) Combination of 16S rRNA-targeted oligonucleotide probes with flow cytometry for analyzing mixed microbial populations. *Appl Environ Microbiol* 56:1919-1925.
6. Guo X, Xia X, Tang R, Zhou J, Zhao H, Wang K (2008) Development of a real-time PCR method for Firmicutes and Bacteroidetes in faeces and its application to quantify intestinal population of obese and lean pigs. *Lett Appl Microbiol* 47:367-373.
7. Fierer N, Jackson JA, Vilgalys R, Jackson RB (2005) Assessment of soil microbial community structure by use of taxon-specific quantitative PCR assays. *Appl Environ Microbiol* 71:4117-4120.
8. Geiss GK, Bumgarner RE, Birditt B, Dahl T, Dowidar N, Dunaway DL, Fell HP, Ferree S, George RD, Grogan T *et al.* (2008) Direct multiplexed measurement of gene expression with color-coded probe pairs. *Nat Biotechnol* 26:317-325.

**Table S1.** Identification of regulated genes in mouse colonic epithelial cells by microarray analysis.**A. List of genes up-regulated by the designated factor(s)**

| Passive SlgA only | Active SlgA only | DSS only       | Passive and Active SlgA | Passive SlgA and DSS | Active SlgA and DSS | Passive and Active SlgA and DSS |
|-------------------|------------------|----------------|-------------------------|----------------------|---------------------|---------------------------------|
| <i>Acp5</i>       | <i>Ctsm</i>      | <i>Abce1</i>   | <i>Ccl5</i>             | <i>Aaas</i>          | <i>Acox1</i>        | <i>Cenpi</i>                    |
| <i>Ap2a2</i>      | <i>Cyp4a12b</i>  | <i>Abhd13</i>  | <i>Cyp11b1</i>          | <i>Acss1</i>         | <i>Atp2c2</i>       | <i>Ctse</i>                     |
| <i>Arf1</i>       | <i>Ear10</i>     | <i>Acadl</i>   | <i>Sirpb1</i>           | <i>Ak3</i>           | <i>Baat</i>         | <i>E2f8</i>                     |
| <i>Bace2</i>      | <i>Gabrg1</i>    | <i>Ada</i>     | <i>Sprr2d</i>           | <i>Alg3</i>          | <i>Bcl2</i>         | <i>Farsb</i>                    |
| <i>Cd151</i>      | <i>Gm906</i>     | <i>Adam10</i>  | <i>Tas2r139</i>         | <i>Alg8</i>          | <i>Bcl2a1d</i>      | <i>Ide</i>                      |
| <i>Cmah</i>       | <i>Igh</i>       | <i>Adcy2</i>   | <i>Zfand2a</i>          | <i>Alg9</i>          | <i>Calcb</i>        | <i>Mrps18b</i>                  |
| <i>Dsg1a</i>      | <i>Il7r</i>      | <i>Adprh</i>   |                         | <i>Anxa4</i>         | <i>Ccdc93</i>       | <i>Ndufaf4</i>                  |
| <i>Ggcx</i>       | <i>Olfr1052</i>  | <i>Ak3l1</i>   |                         | <i>Ap1s1</i>         | <i>Cyp3a41a</i>     | <i>Nlk</i>                      |
| <i>Gltpd1</i>     | <i>Olfr1090</i>  | <i>Akr1c18</i> |                         | <i>Ap3d1</i>         | <i>Cyp4x1</i>       | <i>Olfr105</i>                  |
| <i>Mbnl3</i>      | <i>Olfr1141</i>  | <i>Aldh1a3</i> |                         | <i>Aqp4</i>          | <i>Defb39</i>       | <i>Olfr270</i>                  |
| <i>Nov</i>        | <i>Olfr1197</i>  | <i>Ankrd50</i> |                         | <i>Arpc1b</i>        | <i>Dirc2</i>        | <i>Smarca1</i>                  |
| <i>Olfr101</i>    | <i>Olfr1280</i>  | <i>Apaf1</i>   |                         | <i>Arpc4</i>         | <i>Dnajc24</i>      | <i>Vmn2r109</i>                 |
| <i>Olfr866</i>    | <i>Olfr1301</i>  | <i>Apobec3</i> |                         | <i>Asf1b</i>         | <i>Ear6</i>         | <i>Wbscr22</i>                  |
| <i>Pold2</i>      | <i>Olfr1308</i>  | <i>Arf2</i>    |                         | <i>B3gnt3</i>        | <i>F10</i>          | <i>Xlr5b</i>                    |
| <i>Pole2</i>      | <i>Olfr132</i>   | <i>Arrdc3</i>  |                         | <i>Bpnt1</i>         | <i>Ggta1</i>        |                                 |
| <i>Rab7l1</i>     | <i>Olfr1335</i>  | <i>Asprv1</i>  |                         | <i>Calm3</i>         | <i>Gm1527</i>       |                                 |
| <i>Rnf181</i>     | <i>Olfr1385</i>  | <i>Atic</i>    |                         | <i>Car9</i>          | <i>Meis3</i>        |                                 |
| <i>Slc31a2</i>    | <i>Olfr154</i>   | <i>Atp8a1</i>  |                         | <i>Ccdc109a</i>      | <i>Mlph</i>         |                                 |
| <i>Sumo2</i>      | <i>Olfr171</i>   | <i>Atpif1</i>  |                         | <i>Ccnd1</i>         | <i>Mlxipl</i>       |                                 |
| <i>Taf6</i>       | <i>Olfr19</i>    | <i>B3galt5</i> |                         | <i>Cct6a</i>         | <i>Mpeg1</i>        |                                 |
| <i>Topbp1</i>     | <i>Olfr380</i>   | <i>Basp1</i>   |                         | <i>Cd72</i>          | <i>Olfr1104</i>     |                                 |
| <i>Twsg1</i>      | <i>Olfr574</i>   | <i>Bcl2a1a</i> |                         | <i>Cd80</i>          | <i>Olfr1138</i>     |                                 |
|                   | <i>Olfr582</i>   | <i>Bcl2a1b</i> |                         | <i>Cd97</i>          | <i>Olfr1328</i>     |                                 |
|                   | <i>Olfr668</i>   | <i>Bloc1s3</i> |                         | <i>Cdk2ap1</i>       | <i>Olfr138</i>      |                                 |
|                   | <i>Olfr670</i>   | <i>Bpgm</i>    |                         | <i>Chek1</i>         | <i>Olfr23</i>       |                                 |
|                   | <i>Olfr688</i>   | <i>Bst1</i>    |                         | <i>Cks2</i>          | <i>Olfr395</i>      |                                 |
|                   | <i>Olfr706</i>   | <i>C1s</i>     |                         | <i>Cpne3</i>         | <i>Olfr533</i>      |                                 |
|                   | <i>Olfr835</i>   | <i>C3</i>      |                         | <i>Ctsc</i>          | <i>Olfr643</i>      |                                 |
|                   | <i>Olfr934</i>   | <i>C5ar1</i>   |                         | <i>Dcbl1d</i>        | <i>Olfr657</i>      |                                 |
|                   | <i>Olfr988</i>   | <i>Calr</i>    |                         | <i>Ddah1</i>         | <i>Olfr813</i>      |                                 |
|                   | <i>Pigr</i>      | <i>Capg</i>    |                         | <i>Ddost</i>         | <i>Olr1</i>         |                                 |
|                   | <i>Rnase12</i>   | <i>Caprin1</i> |                         | <i>Dock10</i>        | <i>Ott</i>          |                                 |
|                   | <i>Rpe65</i>     | <i>Car12</i>   |                         | <i>Elavl1</i>        | <i>Parp3</i>        |                                 |
|                   | <i>Taar8b</i>    | <i>Ccdc134</i> |                         | <i>Eno1</i>          | <i>Pilrb1</i>       |                                 |
|                   | <i>Tmem160</i>   | <i>Ccdc80</i>  |                         | <i>Enpp5</i>         | <i>Ptch1</i>        |                                 |
|                   | <i>Tmprss11b</i> | <i>Ccl3</i>    |                         | <i>Epsti1</i>        | <i>S100pbp</i>      |                                 |
|                   | <i>V1rc7</i>     | <i>Ccl9</i>    |                         | <i>Expi</i>          | <i>Siglece</i>      |                                 |
|                   | <i>V1rg2</i>     | <i>Ccrl2</i>   |                         | <i>Fads3</i>         | <i>Slamf7</i>       |                                 |
|                   | <i>Vmn2r18</i>   | <i>Cd14</i>    |                         | <i>Fam57a</i>        | <i>Spam1</i>        |                                 |
|                   | <i>Xlr5a</i>     | <i>Cd33</i>    |                         | <i>Fut2</i>          | <i>St6gal1</i>      |                                 |
|                   | <i>Zfy1</i>      | <i>Cd38</i>    |                         | <i>Gatad1</i>        | <i>Tdo2</i>         |                                 |
|                   |                  | <i>Cd47</i>    |                         | <i>Gna14</i>         | <i>Tnni1</i>        |                                 |

Table S1, continued

| DSS only        | Passive SlgA and DSS | Active SlgA and DSS | DSS only       | Passive SlgA and DSS |
|-----------------|----------------------|---------------------|----------------|----------------------|
| <i>Cd53</i>     | <i>Gnpda1</i>        | <i>Trem14</i>       | <i>Fam118b</i> | <i>S100a11</i>       |
| <i>Cd74</i>     | <i>Golm1</i>         | <i>Trim6</i>        | <i>Fam124a</i> | <i>Scamp4</i>        |
| <i>Chi3l1</i>   | <i>Gorasp2</i>       | <i>Zeb2</i>         | <i>Fam3b</i>   | <i>Scfd2</i>         |
| <i>Chmp4b</i>   | <i>Gstk1</i>         |                     | <i>Fam3c</i>   | <i>Sec61a1</i>       |
| <i>Ckap4</i>    | <i>Guca2a</i>        |                     | <i>Fbln1</i>   | <i>Sema7a</i>        |
| <i>Clca2</i>    | <i>H2afy</i>         |                     | <i>Fcer1g</i>  | <i>Sh3bgrl2</i>      |
| <i>Clec4d</i>   | <i>H2-Eb1</i>        |                     | <i>Fcgr2b</i>  | <i>Slc39a11</i>      |
| <i>Clec4e</i>   | <i>Hspd1</i>         |                     | <i>Fcgr3</i>   | <i>Slc7a7</i>        |
| <i>Clec7a</i>   | <i>Kcnk6</i>         |                     | <i>Fkbp1a</i>  | <i>Snap23</i>        |
| <i>Cnp</i>      | <i>Lin54</i>         |                     | <i>Fpr1</i>    | <i>Spcs3</i>         |
| <i>Cox18</i>    | <i>Lrrc59</i>        |                     | <i>Fry</i>     | <i>Srgn</i>          |
| <i>Cpne2</i>    | <i>M6pr</i>          |                     | <i>Fxyd5</i>   | <i>Srm</i>           |
| <i>Csf1r</i>    | <i>Mif</i>           |                     | <i>Fzd1</i>    | <i>Ssr3</i>          |
| <i>Csf2rb</i>   | <i>Mipep</i>         |                     | <i>Gars</i>    | <i>Sub1</i>          |
| <i>Csf2rb2</i>  | <i>Mki67ip</i>       |                     | <i>Gbp2</i>    | <i>Sulf1</i>         |
| <i>Ctps</i>     | <i>Mrps27</i>        |                     | <i>Gbp4</i>    | <i>Tbccd1</i>        |
| <i>Cxcl2</i>    | <i>Mtap</i>          |                     | <i>Gbp5</i>    | <i>Tcof1</i>         |
| <i>Cxcl9</i>    | <i>Mtpn</i>          |                     | <i>Gcnt2</i>   | <i>Thg1l</i>         |
| <i>Cyba</i>     | <i>Nadk</i>          |                     | <i>Gda</i>     | <i>Tpm3</i>          |
| <i>Cybb</i>     | <i>Ndr3</i>          |                     | <i>Glo1</i>    | <i>Tuba1b</i>        |
| <i>Daglb</i>    | <i>Nmt1</i>          |                     | <i>Gm379</i>   | <i>Twf1</i>          |
| <i>Dapk2</i>    | <i>Npn2</i>          |                     | <i>Gp49a</i>   | <i>Ube2l3</i>        |
| <i>Dcp2</i>     | <i>Nrbp2</i>         |                     | <i>Gpr110</i>  | <i>Ubqln1</i>        |
| <i>Degs1</i>    | <i>Nudt4</i>         |                     | <i>Gpx2</i>    | <i>Usp39</i>         |
| <i>Dgat2</i>    | <i>P2ry5</i>         |                     | <i>Gsdmc2</i>  | <i>Vamp3</i>         |
| <i>Dhrs9</i>    | <i>Pdlim1</i>        |                     | <i>Gsdmd</i>   | <i>Vkorc1l1</i>      |
| <i>Dhx29</i>    | <i>Pglyrp1</i>       |                     | <i>Gusb</i>    | <i>Wrb</i>           |
| <i>Dis3</i>     | <i>Pigu</i>          |                     | <i>H13</i>     | <i>Yars2</i>         |
| <i>Dnaja2</i>   | <i>Pklr</i>          |                     | <i>H2-Aa</i>   | <i>Ywhah</i>         |
| <i>Dpp9</i>     | <i>Plrg1</i>         |                     | <i>H6pd</i>    | <i>Zdhhc15</i>       |
| <i>Dsc2</i>     | <i>Pmepa1</i>        |                     | <i>Hars</i>    | <i>Zdhhc3</i>        |
| <i>Duox2</i>    | <i>Pnp2</i>          |                     | <i>Hdc</i>     | <i>Zfp27</i>         |
| <i>Duoxa2</i>   | <i>Ppih</i>          |                     | <i>Heatr1</i>  | <i>Zfp652</i>        |
| <i>Dus1l</i>    | <i>Prpf4</i>         |                     | <i>Hk2</i>     |                      |
| <i>Dynl1</i>    | <i>Prps1</i>         |                     | <i>Hyou1</i>   |                      |
| <i>Efhd2</i>    | <i>Psmb2</i>         |                     | <i>Icam1</i>   |                      |
| <i>Egln3</i>    | <i>Psmd14</i>        |                     | <i>Ick</i>     |                      |
| <i>Eif3b</i>    | <i>Psme3</i>         |                     | <i>Idh1</i>    |                      |
| <i>Eif4a3</i>   | <i>Rad18</i>         |                     | <i>Ido1</i>    |                      |
| <i>Eif4e3</i>   | <i>Rbp4</i>          |                     | <i>Ier3</i>    |                      |
| <i>Entpd1</i>   | <i>Reep6</i>         |                     | <i>Ifi205</i>  |                      |
| <i>Epb4.1l2</i> | <i>Rpn1</i>          |                     | <i>Ifitm1</i>  |                      |
| <i>Ermp1</i>    | <i>Rpn2</i>          |                     | <i>Ifitm3</i>  |                      |
| <i>Ero1l</i>    | <i>Rrm2</i>          |                     | <i>Ifnar2</i>  |                      |

Table S1, continued

| DSS only      |                 |                |                 |                 |                |                 |
|---------------|-----------------|----------------|-----------------|-----------------|----------------|-----------------|
| <i>Igsf6</i>  | <i>Lpcat4</i>   | <i>Ncf1</i>    | <i>Phf5a</i>    | <i>Rassf4</i>   | <i>Slc35b1</i> | <i>Tlr2</i>     |
| <i>Iigp1</i>  | <i>Lrg1</i>     | <i>Ndufa12</i> | <i>Pilra</i>    | <i>Rbm12b</i>   | <i>Slc3a1</i>  | <i>Tmc5</i>     |
| <i>Il1a</i>   | <i>Lrp8</i>     | <i>Nek6</i>    | <i>Pion</i>     | <i>Reg3b</i>    | <i>Slc5a9</i>  | <i>Tmcc3</i>    |
| <i>Il1b</i>   | <i>Lsp1</i>     | <i>Nfkbiz</i>  | <i>Pla2g5</i>   | <i>Reg3g</i>    | <i>Slc7a11</i> | <i>Tmem54</i>   |
| <i>Il1f9</i>  | <i>Ltf</i>      | <i>Ngly1</i>   | <i>Pla2g7</i>   | <i>Retnlg</i>   | <i>Slfn2</i>   | <i>Tmem55a</i>  |
| <i>Il1r2</i>  | <i>Ly6a</i>     | <i>Niacr1</i>  | <i>Plat</i>     | <i>Ripk1</i>    | <i>Smad4</i>   | <i>Tmsb10</i>   |
| <i>Il23a</i>  | <i>Ly6c1</i>    | <i>Nlrp3</i>   | <i>Plcl2</i>    | <i>Ripk2</i>    | <i>Smpd3</i>   | <i>Tnf</i>      |
| <i>Il34</i>   | <i>Ly6c2</i>    | <i>Nop2</i>    | <i>Plek</i>     | <i>Ripk3</i>    | <i>Snd1</i>    | <i>Tnfaip2</i>  |
| <i>Il4ra</i>  | <i>Ly6i</i>     | <i>Nos2</i>    | <i>Plek2</i>    | <i>Rnf114</i>   | <i>Snx4</i>    | <i>Tnfrsf1b</i> |
| <i>Il5ra</i>  | <i>Lyn</i>      | <i>Noxo1</i>   | <i>Polg</i>     | <i>Rnf121</i>   | <i>Socs3</i>   | <i>Tnik</i>     |
| <i>Il6</i>    | <i>Marcksl1</i> | <i>Nsun2</i>   | <i>Ppp1r14b</i> | <i>Robo2</i>    | <i>Srms</i>    | <i>Trem1</i>    |
| <i>Il8rb</i>  | <i>Me1</i>      | <i>Nupr1</i>   | <i>Prdm1</i>    | <i>Rps19bp1</i> | <i>Ssh1</i>    | <i>Trim15</i>   |
| <i>Irf8</i>   | <i>Med21</i>    | <i>Osmr</i>    | <i>Prom1</i>    | <i>Rps2</i>     | <i>Stat1</i>   | <i>Trim29</i>   |
| <i>Irg1</i>   | <i>Mfsd2</i>    | <i>Ostf1</i>   | <i>Psat1</i>    | <i>Rrbp1</i>    | <i>Stat3</i>   | <i>Trim40</i>   |
| <i>Itga2</i>  | <i>Micall2</i>  | <i>Otud7b</i>  | <i>Psemb3</i>   | <i>S100a8</i>   | <i>Steap4</i>  | <i>Trim65</i>   |
| <i>Jagn1</i>  | <i>Mid1</i>     | <i>P4ha1</i>   | <i>Psemb9</i>   | <i>S100a9</i>   | <i>Stip1</i>   | <i>Trps1</i>    |
| <i>Jak3</i>   | <i>Mkl1</i>     | <i>P4hb</i>    | <i>Psmc2</i>    | <i>Samsn1</i>   | <i>Stt3b</i>   | <i>Twf2</i>     |
| <i>Jmjd6</i>  | <i>Mmp28</i>    | <i>Pdcd11</i>  | <i>Psmc3</i>    | <i>Sar1b</i>    | <i>Stx7</i>    | <i>Tyrobp</i>   |
| <i>Kctd5</i>  | <i>Mrpl3</i>    | <i>Pde11a</i>  | <i>Ptafr</i>    | <i>Scmh1</i>    | <i>Sulf2</i>   | <i>Ube2s</i>    |
| <i>Lap3</i>   | <i>Ms4a8a</i>   | <i>Pde9a</i>   | <i>Ptges</i>    | <i>Sdf2l1</i>   | <i>Tac1</i>    | <i>Upk1b</i>    |
| <i>Lbp</i>    | <i>Msn</i>      | <i>Pdgfc</i>   | <i>Ptgs2</i>    | <i>Sec61a2</i>  | <i>Taok3</i>   | <i>Vim</i>      |
| <i>Lcn2</i>   | <i>Mst1r</i>    | <i>Pdia4</i>   | <i>Ptk2</i>     | <i>Sema6d</i>   | <i>Tfdp1</i>   | <i>Xdh</i>      |
| <i>Lcp1</i>   | <i>Mtap7d1</i>  | <i>Pdss1</i>   | <i>Ptprd</i>    | <i>Serpina2</i> | <i>Tgtp</i>    | <i>Xpo1</i>     |
| <i>Lcp2</i>   | <i>Mtrr</i>     | <i>Pgam5</i>   | <i>Purb</i>     | <i>Serping1</i> | <i>Thsd4</i>   | <i>Zbp1</i>     |
| <i>Lgmn</i>   | <i>My17</i>     | <i>Pgap1</i>   | <i>Rab32</i>    | <i>Sh3kbp1</i>  | <i>Tifa</i>    | <i>Zc3h12a</i>  |
| <i>Lilrb4</i> | <i>N4bp1</i>    | <i>Pgk1</i>    | <i>Rab8b</i>    | <i>Slc15a3</i>  | <i>Tinagl1</i> | <i>Zranb1</i>   |
| <i>Lipk</i>   | <i>Ncald</i>    | <i>Pgs1</i>    | <i>Ranbp17</i>  | <i>Slc16a3</i>  | <i>Tln2</i>    |                 |

Table S1, continued

## B. List of genes down-regulated by the designated factor(s)

| Passive SlgA only | Active SlgA only | DSS only        | Passive and Active SlgA | Passive SlgA and DSS | Active SlgA and DSS | Passive and Active SlgA and DSS |
|-------------------|------------------|-----------------|-------------------------|----------------------|---------------------|---------------------------------|
| <i>Akap8l</i>     | <i>Aen</i>       | <i>Abat</i>     | <i>Cpt1b</i>            | <i>Abcb1a</i>        | <i>Agpat3</i>       | <i>Csnk2b</i>                   |
| <i>Apbb3</i>      | <i>Akt1</i>      | <i>Abhd2</i>    | <i>Dgcr2</i>            | <i>Abi3</i>          | <i>Aqp1</i>         | <i>Efcab4b</i>                  |
| <i>Apol8</i>      | <i>Alox5</i>     | <i>Abp1</i>     | <i>Dhx30</i>            | <i>Akt3</i>          | <i>Aqr</i>          | <i>Fryl</i>                     |
| <i>Blcap</i>      | <i>B3galtl</i>   | <i>Abr</i>      | <i>Epha1</i>            | <i>Alpk1</i>         | <i>Arhgef2</i>      | <i>Ilkap</i>                    |
| <i>Ccdc3</i>      | <i>Cep68</i>     | <i>Abtb2</i>    | <i>Fer1l6</i>           | <i>Ank3</i>          | <i>Axin2</i>        | <i>Junb</i>                     |
| <i>Clip2</i>      | <i>Ddx56</i>     | <i>Acaa1a</i>   | <i>Gripap1</i>          | <i>Ano1</i>          | <i>Cbfa2t3</i>      | <i>Lrig1</i>                    |
| <i>Cxadr</i>      | <i>Far2</i>      | <i>Acer1</i>    | <i>Huwe1</i>            | <i>Apitd1</i>        | <i>Cdc25a</i>       | <i>Map3k9</i>                   |
| <i>Cyp27a1</i>    | <i>Gzfl</i>      | <i>Acsl1</i>    | <i>Nacc1</i>            | <i>Arrdc2</i>        | <i>Chmp1a</i>       | <i>Mier3</i>                    |
| <i>D1Pas1</i>     | <i>Hp1bp3</i>    | <i>Acss2</i>    | <i>Naf1</i>             | <i>Atg16l2</i>       | <i>Clcn6</i>        | <i>Rbbp6</i>                    |
| <i>Ddit3</i>      | <i>Mcph1</i>     | <i>Adam15</i>   | <i>Nfx1</i>             | <i>Atg7</i>          | <i>Dach1</i>        | <i>Snord49a</i>                 |
| <i>Dppa3</i>      | <i>Mettl1</i>    | <i>Adck5</i>    | <i>Plk4</i>             | <i>Atp12a</i>        | <i>Def8</i>         | <i>Spata13</i>                  |
| <i>Dsg2</i>       | <i>Mre11a</i>    | <i>Add3</i>     | <i>Rasa4</i>            | <i>Bach2</i>         | <i>Dennd1a</i>      | <i>Whsc1l1</i>                  |
| <i>Dyrk2</i>      | <i>N4bp2</i>     | <i>Adh1</i>     | <i>Snora7a</i>          | <i>Bfsp1</i>         | <i>Dpyd</i>         | <i>Yaf2</i>                     |
| <i>Fam83e</i>     | <i>Phf12</i>     | <i>Agap1</i>    | <i>Syt7</i>             | <i>Btg2</i>          | <i>Ern2</i>         |                                 |
| <i>Fbxo4</i>      | <i>Rhobtb1</i>   | <i>Agfg2</i>    | <i>Tdp1</i>             | <i>Ccdc116</i>       | <i>Exosc1</i>       |                                 |
| <i>Gtf2ird1</i>   | <i>Setd1a</i>    | <i>Ahcyl2</i>   | <i>Zer1</i>             | <i>Ccrn4l</i>        | <i>Fam115c</i>      |                                 |
| <i>Herc2</i>      | <i>Spats2</i>    | <i>Ahnak2</i>   | <i>Zfp407</i>           | <i>Chd7</i>          | <i>Farp1</i>        |                                 |
| <i>Ip6k1</i>      | <i>Trdn</i>      | <i>Al854703</i> | <i>Zfp687</i>           | <i>Clcn2</i>         | <i>Foxk2</i>        |                                 |
| <i>Ipo7</i>       | <i>Ubtf</i>      | <i>Akap2</i>    |                         | <i>Clic5</i>         | <i>Gbe1</i>         |                                 |
| <i>Irf1</i>       |                  | <i>Alb</i>      |                         | <i>Coq7</i>          | <i>Glt1d1</i>       |                                 |
| <i>Map2k7</i>     |                  | <i>Aldh6a1</i>  |                         | <i>Crim1</i>         | <i>Gm1123</i>       |                                 |
| <i>Myo18a</i>     |                  | <i>Amotl1</i>   |                         | <i>Cyp4f13</i>       | <i>Gpam</i>         |                                 |
| <i>Myo1h</i>      |                  | <i>Ankrd10</i>  |                         | <i>Dll1</i>          | <i>Greb1</i>        |                                 |
| <i>Nr1d2</i>      |                  | <i>Ankrd9</i>   |                         | <i>Dot1l</i>         | <i>Gsr</i>          |                                 |
| <i>Numb</i>       |                  | <i>Ap4b1</i>    |                         | <i>Eppk1</i>         | <i>Gsta2</i>        |                                 |
| <i>Pex12</i>      |                  | <i>Appl2</i>    |                         | <i>Erbp3</i>         | <i>Gtf2i</i>        |                                 |
| <i>Prpsap2</i>    |                  | <i>Aqp8</i>     |                         | <i>Etl4</i>          | <i>Iars</i>         |                                 |
| <i>Rapgef4</i>    |                  | <i>Arhgap27</i> |                         | <i>Fam161a</i>       | <i>Idua</i>         |                                 |
| <i>Rnu12</i>      |                  | <i>Ascl2</i>    |                         | <i>Foxo3</i>         | <i>Ikbkb</i>        |                                 |
| <i>Rnu1b1</i>     |                  | <i>Atad4</i>    |                         | <i>Gse1</i>          | <i>Insig2</i>       |                                 |
| <i>Rnu3a</i>      |                  | <i>Atoh1</i>    |                         | <i>Hdac5</i>         | <i>Kank1</i>        |                                 |
| <i>Rny1</i>       |                  | <i>Atp6v1e1</i> |                         | <i>Hoxd11</i>        | <i>Kat2a</i>        |                                 |
| <i>Rpl27a</i>     |                  | <i>Atxn2</i>    |                         | <i>Hps4</i>          | <i>Kcne3</i>        |                                 |
| <i>Rprl1</i>      |                  | <i>Best2</i>    |                         | <i>Il17rc</i>        | <i>Kpnb1</i>        |                                 |
| <i>Rprl2</i>      |                  | <i>Boc</i>      |                         | <i>Irs2</i>          | <i>Ldb1</i>         |                                 |
| <i>Rps12</i>      |                  | <i>Cabc1</i>    |                         | <i>Kalrn</i>         | <i>Lgr5</i>         |                                 |
| <i>Setd1b</i>     |                  | <i>Cachd1</i>   |                         | <i>Kdm4a</i>         | <i>Mrps22</i>       |                                 |
| <i>Slc36a1</i>    |                  | <i>Car2</i>     |                         | <i>Klc1</i>          | <i>Olfr1380</i>     |                                 |
| <i>Smg1</i>       |                  | <i>Caskin2</i>  |                         | <i>Klf3</i>          | <i>Olfr148</i>      |                                 |
| <i>Snora62</i>    |                  | <i>Casp14</i>   |                         | <i>Klf4</i>          | <i>Pabpc4</i>       |                                 |
| <i>Snord52</i>    |                  | <i>Ccbl1</i>    |                         | <i>Lmo4</i>          | <i>Pacs1</i>        |                                 |
| <i>Snord85</i>    |                  | <i>Cd200</i>    |                         | <i>Meg3</i>          | <i>Pcgf2</i>        |                                 |

Table S1, continued

| Passive SlgA only | Active SlgA only | DSS only        | Passive and Active SlgA | Passive SlgA and DSS | Active SlgA and DSS | Passive and Active SlgA and DSS |
|-------------------|------------------|-----------------|-------------------------|----------------------|---------------------|---------------------------------|
| <i>Spg7</i>       |                  | <i>Cd83</i>     |                         | <i>Mtmr4</i>         | <i>Pla2g2a</i>      |                                 |
| <i>Ston1</i>      |                  | <i>Cdc42bpb</i> |                         | <i>Myh14</i>         | <i>Pm20d1</i>       |                                 |
| <i>Supt5h</i>     |                  | <i>Cdkl1</i>    |                         | <i>Myo7b</i>         | <i>Ppt2</i>         |                                 |
| <i>Vasp</i>       |                  | <i>Cdo1</i>     |                         | <i>Neu1</i>          | <i>Prl2b1</i>       |                                 |
| <i>Zc3hav1l</i>   |                  | <i>cela1</i>    |                         | <i>Nr1d1</i>         | <i>Prl3a1</i>       |                                 |
|                   |                  | <i>Chdh</i>     |                         | <i>Nr3c2</i>         | <i>Qdpr</i>         |                                 |
|                   |                  | <i>Clps</i>     |                         | <i>Pacrgl</i>        | <i>Qtrt1</i>        |                                 |
|                   |                  | <i>Clybl</i>    |                         | <i>Peli2</i>         | <i>Rab27a</i>       |                                 |
|                   |                  | <i>Cnksr3</i>   |                         | <i>Pik3c2b</i>       | <i>Sdr16c5</i>      |                                 |
|                   |                  | <i>Cnnm4</i>    |                         | <i>Plec1</i>         | <i>Senp1</i>        |                                 |
|                   |                  | <i>Cobl</i>     |                         | <i>Plekhg5</i>       | <i>Slc24a3</i>      |                                 |
|                   |                  | <i>Col8a1</i>   |                         | <i>Pmvk</i>          | <i>Smg6</i>         |                                 |
|                   |                  | <i>Coq10a</i>   |                         | <i>Ppp1r10</i>       | <i>Smoc2</i>        |                                 |
|                   |                  | <i>Cotl1</i>    |                         | <i>Rab11fip4</i>     | <i>Tas2r120</i>     |                                 |
|                   |                  | <i>Cox7a1</i>   |                         | <i>Rgs3</i>          | <i>Tns3</i>         |                                 |
|                   |                  | <i>Cpa2</i>     |                         | <i>Rnf152</i>        | <i>Trappc9</i>      |                                 |
|                   |                  | <i>Cpm</i>      |                         | <i>Sema4g</i>        | <i>Trmt2b</i>       |                                 |
|                   |                  | <i>Cps1</i>     |                         | <i>Sipa1l3</i>       | <i>Tut1</i>         |                                 |
|                   |                  | <i>Crip1</i>    |                         | <i>Slc20a1</i>       | <i>Ugt1a9</i>       |                                 |
|                   |                  | <i>Csad</i>     |                         | <i>Slc26a3</i>       | <i>Xpo5</i>         |                                 |
|                   |                  | <i>Cth</i>      |                         | <i>Slc9a2</i>        | <i>Zbtb38</i>       |                                 |
|                   |                  | <i>Ctns</i>     |                         | <i>Snora30</i>       |                     |                                 |
|                   |                  | <i>Cttnbp2</i>  |                         | <i>Snord118</i>      |                     |                                 |
|                   |                  | <i>Cyp2c40</i>  |                         | <i>Snord32a</i>      |                     |                                 |
|                   |                  | <i>Cyp2d13</i>  |                         | <i>Snord33</i>       |                     |                                 |
|                   |                  | <i>Cyp2d22</i>  |                         | <i>Snord34</i>       |                     |                                 |
|                   |                  | <i>Cyp2f2</i>   |                         | <i>Spnb3</i>         |                     |                                 |
|                   |                  | <i>Cyp2s1</i>   |                         | <i>Spry2</i>         |                     |                                 |
|                   |                  | <i>Cyp4a32</i>  |                         | <i>Syne2</i>         |                     |                                 |
|                   |                  | <i>Cyp4f16</i>  |                         | <i>Synj2</i>         |                     |                                 |
|                   |                  | <i>Ddc</i>      |                         | <i>Synpo</i>         |                     |                                 |
|                   |                  | <i>Dennd2c</i>  |                         | <i>Tat</i>           |                     |                                 |
|                   |                  | <i>Dgkh</i>     |                         | <i>Tgm3</i>          |                     |                                 |
|                   |                  | <i>Dhrs11</i>   |                         | <i>Tns4</i>          |                     |                                 |
|                   |                  | <i>Dip2a</i>    |                         | <i>Trak1</i>         |                     |                                 |
|                   |                  | <i>Dixdc1</i>   |                         | <i>Unc84b</i>        |                     |                                 |
|                   |                  | <i>Dpep1</i>    |                         | <i>Unkl</i>          |                     |                                 |
|                   |                  | <i>Dusp5</i>    |                         | <i>Usp54</i>         |                     |                                 |
|                   |                  | <i>Edn2</i>     |                         | <i>Vdr</i>           |                     |                                 |
|                   |                  | <i>Eef2k</i>    |                         | <i>Zfhx3</i>         |                     |                                 |
|                   |                  | <i>Efna1</i>    |                         | <i>Zfp710</i>        |                     |                                 |
|                   |                  | <i>Efna3</i>    |                         | <i>Zfyve1</i>        |                     |                                 |
|                   |                  | <i>Ell3</i>     |                         | <i>Zfyve27</i>       |                     |                                 |
|                   |                  | <i>Entpd5</i>   |                         | <i>Zmiz1</i>         |                     |                                 |

Table S1, continued

| DSS only       |                |                 |                 |                 |                 |                 |
|----------------|----------------|-----------------|-----------------|-----------------|-----------------|-----------------|
| <i>Ephb3</i>   | <i>Higd1c</i>  | <i>Lmna</i>     | <i>Olfr309</i>  | <i>Ptpn13</i>   | <i>Sfxn5</i>    | <i>Syn2</i>     |
| <i>Fabp2</i>   | <i>Hk1</i>     | <i>Lrat</i>     | <i>Olfr497</i>  | <i>Ptpn3</i>    | <i>Shisa2</i>   | <i>Syt11</i>    |
| <i>Fam134b</i> | <i>Hmcn1</i>   | <i>Lsr</i>      | <i>Olfr669</i>  | <i>Ptpn9</i>    | <i>Sik1</i>     | <i>Tas2r131</i> |
| <i>Fam3a</i>   | <i>Hnf4a</i>   | <i>Luzp4</i>    | <i>Olfr812</i>  | <i>Pttg1</i>    | <i>Slc15a1</i>  | <i>Tbc1d19</i>  |
| <i>Fam55b</i>  | <i>Hpcal1</i>  | <i>Ly6g6c</i>   | <i>Pacsin2</i>  | <i>Pyroxd2</i>  | <i>Slc16a12</i> | <i>Tbc1d8</i>   |
| <i>Fam55d</i>  | <i>Hpgd</i>    | <i>Maob</i>     | <i>Papss1</i>   | <i>Rab5b</i>    | <i>Slc16a7</i>  | <i>Tceal8</i>   |
| <i>Farp2</i>   | <i>Hsd17b2</i> | <i>Mbc2</i>     | <i>Pccb</i>     | <i>Ramp1</i>    | <i>Slc22a23</i> | <i>Tcn2</i>     |
| <i>Fbxo32</i>  | <i>Hsd3b7</i>  | <i>Mcoln1</i>   | <i>Pck1</i>     | <i>Rapgef11</i> | <i>Slc24a6</i>  | <i>Timp3</i>    |
| <i>Fgfr3</i>   | <i>Htr4</i>    | <i>Mep1a</i>    | <i>Pcx</i>      | <i>Rasd1</i>    | <i>Slc25a23</i> | <i>Tm6sf2</i>   |
| <i>Fhl1</i>    | <i>Hunk</i>    | <i>Mettl7a1</i> | <i>Pdk2</i>     | <i>Rasd2</i>    | <i>Slc25a25</i> | <i>Tmem171</i>  |
| <i>Fkbp9</i>   | <i>Id2</i>     | <i>Mgrn1</i>    | <i>Pdxk</i>     | <i>Rasgef1b</i> | <i>Slc27a1</i>  | <i>Tmem35</i>   |
| <i>Fmo1</i>    | <i>Id3</i>     | <i>Mkx</i>      | <i>Pdzd7</i>    | <i>Rbp2</i>     | <i>Slc34a2</i>  | <i>Tmx4</i>     |
| <i>Frmf8</i>   | <i>Iffo2</i>   | <i>Mme</i>      | <i>Perld1</i>   | <i>Repin1</i>   | <i>Slc46a1</i>  | <i>Tpcn1</i>    |
| <i>Fut9</i>    | <i>Iji2711</i> | <i>Mrgpra2</i>  | <i>Pfkfb4</i>   | <i>Rftn2</i>    | <i>Slc6a4</i>   | <i>Tppp</i>     |
| <i>Fxyd4</i>   | <i>Ijna7</i>   | <i>Msi2</i>     | <i>Pfkm</i>     | <i>Rfxank</i>   | <i>Slc6a8</i>   | <i>Tppp3</i>    |
| <i>Fzd7</i>    | <i>Igsf9</i>   | <i>Mtmr3</i>    | <i>Phlpl</i>    | <i>Rgs17</i>    | <i>Slc9a3r1</i> | <i>Trib1</i>    |
| <i>Garnl4</i>  | <i>Inpp5j</i>  | <i>Mupcdh</i>   | <i>Pisd-ps1</i> | <i>Rhoc</i>     | <i>Slco1a6</i>  | <i>Trpm6</i>    |
| <i>Gas6</i>    | <i>Insr</i>    | <i>Naaladl1</i> | <i>Pkhd111</i>  | <i>Rhot2</i>    | <i>Slco2a1</i>  | <i>Trpv3</i>    |
| <i>Gba2</i>    | <i>Insrr</i>   | <i>Ndrp2</i>    | <i>Pla2g3</i>   | <i>Rhou</i>     | <i>Smad6</i>    | <i>Trpv6</i>    |
| <i>Gdf15</i>   | <i>Ipmk</i>    | <i>Nek5</i>     | <i>Plbd1</i>    | <i>Rin3</i>     | <i>Smad7</i>    | <i>Tshz1</i>    |
| <i>Glul</i>    | <i>Irf6</i>    | <i>Nelf</i>     | <i>Plcb1</i>    | <i>Ror1</i>     | <i>Smpx</i>     | <i>Tspan33</i>  |
| <i>Gm967</i>   | <i>Itih2</i>   | <i>Nit1</i>     | <i>Plekhg6</i>  | <i>Rtn1</i>     | <i>Sned1</i>    | <i>Ttll6</i>    |
| <i>Gnb5</i>    | <i>Itm2b</i>   | <i>Nnt</i>      | <i>Plekhh1</i>  | <i>Saps1</i>    | <i>Sorbs2</i>   | <i>Ttr</i>      |
| <i>Golph3l</i> | <i>Itpr1</i>   | <i>Npc1</i>     | <i>Plk3</i>     | <i>Scamp1</i>   | <i>Spdya</i>    | <i>Unc45a</i>   |
| <i>Gpr175</i>  | <i>Itpr2</i>   | <i>Npc2</i>     | <i>Pmp22</i>    | <i>Scamp5</i>   | <i>Sstr1</i>    | <i>Unc5b</i>    |
| <i>Gpt</i>     | <i>Kcnh8</i>   | <i>Nr4a1</i>    | <i>Pnpo</i>     | <i>Scin</i>     | <i>St3gal6</i>  | <i>Upk1a</i>    |
| <i>Gramd1a</i> | <i>Kcnk5</i>   | <i>Odf3b</i>    | <i>Ppargc1a</i> | <i>Scnn1a</i>   | <i>Steap3</i>   | <i>V1re12</i>   |
| <i>Gramd4</i>  | <i>Kif1c</i>   | <i>Oit1</i>     | <i>Ppp1r3b</i>  | <i>Selenbp1</i> | <i>Stim1</i>    | <i>Wdr59</i>    |
| <i>Grb7</i>    | <i>Kit</i>     | <i>Olfr107</i>  | <i>Prep</i>     | <i>Selenbp2</i> | <i>Stk10</i>    | <i>Wee1</i>     |
| <i>Grik5</i>   | <i>Klhl21</i>  | <i>Olfr1247</i> | <i>Prkar2b</i>  | <i>Sema5a</i>   | <i>Stox2</i>    | <i>Wfdc2</i>    |
| <i>Gstm1</i>   | <i>Klk1b26</i> | <i>Olfr130</i>  | <i>Prkcd</i>    | <i>Sema6a</i>   | <i>Sult1a1</i>  | <i>Xpnpep1</i>  |
| <i>Gstm7</i>   | <i>Ldlrad3</i> | <i>Olfr181</i>  | <i>Prlr</i>     | <i>Serinc5</i>  | <i>Sult2b1</i>  | <i>Ypel3</i>    |
| <i>Gstt1</i>   | <i>Lgals3</i>  | <i>Olfr204</i>  | <i>Prss23</i>   | <i>Sfxn3</i>    | <i>Sycn</i>     | <i>Zfp3612</i>  |
| <i>Hexb</i>    | <i>Lhfp12</i>  |                 |                 |                 |                 |                 |

Adult *Pigr*<sup>+/-</sup> and *Pigr*<sup>-/-</sup> offspring from *Pigr*<sup>+/-</sup> and *Pigr*<sup>-/-</sup> dams were given 2% DSS in the drinking water or plain water for 8 days, and RNA was purified from isolated colonic epithelial cells. Gene expression was analyzed using an Affymetrix GeneChip Mouse Gene 1.0 ST array. Normalized data were analyzed by 3-way ANOVA for effects of passive SIgA (maternal *Pigr* genotype), active SIgA (offspring *Pigr* genotype) and DSS treatment (see Fig. S7). Genes included in this list were significantly regulated by the designated factor or combination of factors ( $P < 0.01$ ).



**Table S2.** Regulated genes in mouse colonic epithelial cells that are orthologous to human disease-associated gene loci.

**Human disease association:**

|  |                           |
|--|---------------------------|
|  | Crohn's disease (CD)      |
|  | Ulcerative colitis (UC)   |
|  | IBD (CD and UC)           |
|  | Adult and early onset IBD |
|  | Celiac disease (CeID)     |
|  | CeID and adult IBD        |
|  | CeID and early onset IBD  |

**A. Disease-associated genes up-regulated by the designated factor(s)**

| Passive SigA only | Active SigA only | DSS only      | Passive and Active SigA | Passive SigA and DSS | Active SigA and DSS | Passive and Active SigA and DSS |
|-------------------|------------------|---------------|-------------------------|----------------------|---------------------|---------------------------------|
|                   | <i>Il7r</i>      | <i>Nos2</i>   |                         | <i>Fut2</i>          | <i>Slamf7</i>       |                                 |
|                   | <i>Pigr</i>      | <i>Ripk2</i>  |                         | <i>Calm3</i>         |                     |                                 |
|                   |                  | <i>Ada</i>    |                         | <i>Ube2l3</i>        |                     |                                 |
|                   |                  | <i>Il8rb</i>  |                         |                      |                     |                                 |
|                   |                  | <i>Prdm1</i>  |                         |                      |                     |                                 |
|                   |                  | <i>Psmc3</i>  |                         |                      |                     |                                 |
|                   |                  | <i>Smpd3</i>  |                         |                      |                     |                                 |
|                   |                  | <i>Xpo1</i>   |                         |                      |                     |                                 |
|                   |                  | <i>Cxcl2</i>  |                         |                      |                     |                                 |
|                   |                  | <i>Fcgr2b</i> |                         |                      |                     |                                 |
|                   |                  | <i>Icam1</i>  |                         |                      |                     |                                 |
|                   |                  | <i>Il1r2</i>  |                         |                      |                     |                                 |
|                   |                  | <i>Irf8</i>   |                         |                      |                     |                                 |
|                   |                  | <i>Lilrb4</i> |                         |                      |                     |                                 |
|                   |                  | <i>Lsp1</i>   |                         |                      |                     |                                 |
|                   |                  | <i>Mst1r</i>  |                         |                      |                     |                                 |
|                   |                  | <i>Nupr1</i>  |                         |                      |                     |                                 |
|                   |                  | <i>Stat1</i>  |                         |                      |                     |                                 |
|                   |                  | <i>Stat3</i>  |                         |                      |                     |                                 |
|                   |                  | <i>Ltf</i>    |                         |                      |                     |                                 |
|                   |                  | <i>Plek</i>   |                         |                      |                     |                                 |

**B. Disease-associated genes down-regulated by the designated factor(s)**

| Passive SigA only | Active SigA only | DSS only       | Passive and Active SigA | Passive SigA and DSS | Active SigA and DSS | Passive and Active SigA and DSS |
|-------------------|------------------|----------------|-------------------------|----------------------|---------------------|---------------------------------|
| <i>Irf1</i>       |                  | <i>Fam55d</i>  |                         | <i>Nr1d1</i>         | <i>Pla2g2a</i>      |                                 |
|                   |                  | <i>Grb7</i>    |                         | <i>Slc26a3</i>       |                     |                                 |
|                   |                  | <i>Hnf4a</i>   |                         | <i>Ccdc116</i>       |                     |                                 |
|                   |                  | <i>Perld1</i>  |                         | <i>Vdr</i>           |                     |                                 |
|                   |                  | <i>Prkcd</i>   |                         | <i>Bach2</i>         |                     |                                 |
|                   |                  | <i>Rftn2</i>   |                         | <i>Zmiz1</i>         |                     |                                 |
|                   |                  | <i>Tppp</i>    |                         |                      |                     |                                 |
|                   |                  | <i>Tspan33</i> |                         |                      |                     |                                 |
|                   |                  | <i>Ipmk</i>    |                         |                      |                     |                                 |
|                   |                  | <i>Pfkfb4</i>  |                         |                      |                     |                                 |
|                   |                  | <i>Smad7</i>   |                         |                      |                     |                                 |
|                   |                  | <i>Trib1</i>   |                         |                      |                     |                                 |
|                   |                  | <i>Mttr3</i>   |                         |                      |                     |                                 |
|                   |                  | <i>Sult1a1</i> |                         |                      |                     |                                 |
|                   |                  | <i>Atxn2</i>   |                         |                      |                     |                                 |

The list of regulated genes in mouse colonic epithelial cells (**Table S1**) was scanned for orthologous human gene loci that have been identified in genome-wide association studies for Crohn's disease, ulcerative colitis, early-onset IBD and celiac disease. See Materials and Methods for a detailed description of inclusion criteria.

**Table S3.** List of biological pathways predicted to be regulated by passive SIgA, active SIgA and DSS. Genes that were determined by microarray analysis to be significantly up- or down-regulated by one or more of these factors (see **Table S1**) were scanned for matches in biological pathways indexed in the Reactome pathway database ([www.reactome.org](http://www.reactome.org)). Based on the number of matching genes and the relationships among their biological activities, pathways were identified that are statistically predicted to be regulated by passive SIgA, active SIgA and/or DSS. Pathways highlighted in red are predicted to be up-regulated by the indicated factor, and pathways highlighted in green are predicted to be down-regulated by the indicated factor. For a detailed description of the criteria for pathway selection and statistical methods, see [www.reactome.org](http://www.reactome.org). Additional information on individual genes and pathways can be obtained by opening the hyperlinks in the tables below.

| <b>Biological pathways predicted to be regulated by early exposure to passive SIgA in breast milk</b> |                                                                       |                                                                                                                |
|-------------------------------------------------------------------------------------------------------|-----------------------------------------------------------------------|----------------------------------------------------------------------------------------------------------------|
| Statistical likelihood that the indicated pathway is regulated by passive SIgA ( <i>P</i> -value)     | Genes that map to this pathway                                        | Name of this pathway                                                                                           |
| 3.8e-04                                                                                               | <a href="#">Pold2</a> , <a href="#">Pole2</a>                         | <a href="#">Repair synthesis of patch ~27-30 bases long by DNA polymerase</a>                                  |
| 3.8e-04                                                                                               | <a href="#">Pold2</a> , <a href="#">Pole2</a>                         | <a href="#">Repair synthesis for gap-filling by DNA polymerase in TC-NER</a>                                   |
| 4.3e-04                                                                                               | <a href="#">Pold2</a> , <a href="#">Pole2</a>                         | <a href="#">Gap-filling DNA repair synthesis and ligation in GG-NER</a>                                        |
| 4.3e-04                                                                                               | <a href="#">Pold2</a> , <a href="#">Pole2</a>                         | <a href="#">Gap-filling DNA repair synthesis and ligation in TC-NER</a>                                        |
| 8.3e-04                                                                                               | <a href="#">Pold2</a> , <a href="#">Pole2</a>                         | <a href="#">Telomere C-strand (Lagging Strand) Synthesis</a>                                                   |
| 1.1e-03                                                                                               | <a href="#">Pold2</a> , <a href="#">Pole2</a>                         | <a href="#">Extension of Telomeres</a>                                                                         |
| 1.9e-03                                                                                               | <a href="#">Pold2</a> , <a href="#">Pole2</a>                         | <a href="#">Global Genomic NER (GG-NER)</a>                                                                    |
| 3.3e-03                                                                                               | <a href="#">Pold2</a> , <a href="#">Pole2</a>                         | <a href="#">Transcription-coupled NER (TC-NER)</a>                                                             |
| 3.6e-03                                                                                               | <a href="#">Arf1</a> , <a href="#">Ap2a2</a>                          | <a href="#">Nef Mediated CD4 Down-regulation</a>                                                               |
| 4.1e-03                                                                                               | <a href="#">Pold2</a> , <a href="#">Pole2</a>                         | <a href="#">Nucleotide Excision Repair</a>                                                                     |
| 5.3e-03                                                                                               | <a href="#">Pold2</a> , <a href="#">Pole2</a>                         | <a href="#">Telomere Maintenance</a>                                                                           |
| 5.7e-03                                                                                               | <a href="#">Arf1</a> , <a href="#">Ap2a2</a>                          | <a href="#">Nef-mediates down modulation of cell surface receptors by recruiting them to clathrin adapters</a> |
| 7.1e-03                                                                                               | <a href="#">Arf1</a> , <a href="#">Ap2a2</a>                          | <a href="#">The role of Nef in HIV-1 replication and disease pathogenesis</a>                                  |
| 2.9e-03                                                                                               | <a href="#">Rps12</a> , <a href="#">Rpl27a</a> , <a href="#">Smg1</a> | <a href="#">UPF1 Binds an mRNP with a Termination Codon Preceding an Exon Junction Complex</a>                 |
| 2.9e-03                                                                                               | <a href="#">Rps12</a> , <a href="#">Rpl27a</a> , <a href="#">Smg1</a> | <a href="#">SMG1 Phosphorylates UPF1 (Enhanced by Exon Junction Complex)</a>                                   |
| 3.4e-03                                                                                               | <a href="#">Rps12</a> , <a href="#">Rpl27a</a> , <a href="#">Smg1</a> | <a href="#">Nonsense-Mediated Decay</a>                                                                        |
| 3.4e-03                                                                                               | <a href="#">Rps12</a> , <a href="#">Rpl27a</a> , <a href="#">Smg1</a> | <a href="#">Phosphorylated UPF1 Recruits SMG5, SMG7, SMG6, and PP2A</a>                                        |
| 3.4e-03                                                                                               | <a href="#">Rps12</a> , <a href="#">Rpl27a</a> , <a href="#">Smg1</a> | <a href="#">Nonsense Mediated Decay Enhanced by the Exon Junction Complex</a>                                  |

| <b>Biological pathways predicted to be regulated by active SIgA derived from endogenous transport</b> |                                                                                                                                                                                                                                                                                                |                                                                                   |
|-------------------------------------------------------------------------------------------------------|------------------------------------------------------------------------------------------------------------------------------------------------------------------------------------------------------------------------------------------------------------------------------------------------|-----------------------------------------------------------------------------------|
| Statistical likelihood that the indicated pathway is regulated by active SIgA ( <i>P</i> -value)      | Genes that map to this pathway                                                                                                                                                                                                                                                                 | Name of this pathway                                                              |
| 9.5e-09                                                                                               | <a href="#">Olfr19</a> , <a href="#">Olfr1385</a> , <a href="#">Olfr582</a> , <a href="#">Olfr706</a> , <a href="#">Olfr171</a> , <a href="#">Olfr1141</a> , <a href="#">Olfr688</a> , <a href="#">Olfr380</a> , <a href="#">Olfr1090</a> , <a href="#">Olfr1052</a> , <a href="#">Olfr835</a> | <a href="#">Olfactory Receptor - G Protein olfactory trimer complex formation</a> |
| 9.5e-09                                                                                               | <a href="#">Olfr19</a> , <a href="#">Olfr1385</a> , <a href="#">Olfr582</a> , <a href="#">Olfr706</a> , <a href="#">Olfr171</a> , <a href="#">Olfr1141</a> , <a href="#">Olfr688</a> , <a href="#">Olfr380</a> , <a href="#">Olfr1090</a> , <a href="#">Olfr1052</a> , <a href="#">Olfr835</a> | <a href="#">Olfactory Signaling Pathway</a>                                       |
| 3.0e-06                                                                                               | <a href="#">Olfr19</a> , <a href="#">Olfr1385</a> , <a href="#">Olfr582</a> , <a href="#">Olfr706</a> , <a href="#">Olfr171</a> , <a href="#">Olfr1141</a> , <a href="#">Olfr688</a> , <a href="#">Olfr380</a> , <a href="#">Olfr1090</a> , <a href="#">Olfr1052</a> , <a href="#">Olfr835</a> | <a href="#">GPCR downstream signaling</a>                                         |
| 5.1e-06                                                                                               | <a href="#">Olfr19</a> , <a href="#">Olfr1385</a> , <a href="#">Olfr582</a> , <a href="#">Olfr706</a> , <a href="#">Olfr171</a> , <a href="#">Olfr1141</a> , <a href="#">Olfr688</a> , <a href="#">Olfr380</a> , <a href="#">Olfr1090</a> , <a href="#">Olfr1052</a> , <a href="#">Olfr835</a> | <a href="#">Signaling by GPCR</a>                                                 |
| 4.3e-04                                                                                               | <a href="#">Olfr19</a> , <a href="#">Olfr1385</a> , <a href="#">Olfr582</a> , <a href="#">Olfr706</a> , <a href="#">Olfr171</a> , <a href="#">Olfr1141</a> , <a href="#">Olfr688</a> , <a href="#">Olfr380</a> , <a href="#">Olfr1090</a> , <a href="#">Olfr1052</a> , <a href="#">Olfr835</a> | <a href="#">Signal Transduction</a>                                               |

Table S3, continued.

| Biological pathways predicted to be regulated by oral administration of DSS              |                                                                                                                                                                                                                                                                                                                                                                                                                                                                                                                                                                                                                                                                                                                                                                                                                                                                                                                                                                                                                                                                                                                                                                                                                             |                                                                                                                                          |
|------------------------------------------------------------------------------------------|-----------------------------------------------------------------------------------------------------------------------------------------------------------------------------------------------------------------------------------------------------------------------------------------------------------------------------------------------------------------------------------------------------------------------------------------------------------------------------------------------------------------------------------------------------------------------------------------------------------------------------------------------------------------------------------------------------------------------------------------------------------------------------------------------------------------------------------------------------------------------------------------------------------------------------------------------------------------------------------------------------------------------------------------------------------------------------------------------------------------------------------------------------------------------------------------------------------------------------|------------------------------------------------------------------------------------------------------------------------------------------|
| Statistical likelihood that the indicated pathway is regulated by DSS ( <i>P</i> -value) | Genes that map to this pathway                                                                                                                                                                                                                                                                                                                                                                                                                                                                                                                                                                                                                                                                                                                                                                                                                                                                                                                                                                                                                                                                                                                                                                                              | Name of this pathway                                                                                                                     |
| 6.9e-07                                                                                  | <a href="#">Psm3</a> , <a href="#">Nlrp3</a> , <a href="#">Csf2rb</a> , <a href="#">Cyba</a> , <a href="#">Gbp2</a> , <a href="#">Tyrobp</a> , <a href="#">Stat1</a> , <a href="#">Lcp2</a> , <a href="#">Cd14</a> , <a href="#">Il5ra</a> , <a href="#">Sec61a2</a> , <a href="#">Ube2s</a> , <a href="#">Il6</a> , <a href="#">Fcgr3</a> , <a href="#">Lyn</a> , <a href="#">Ifnar2</a> , <a href="#">Ifitm1</a> , <a href="#">Il1a</a> , <a href="#">Icam1</a> , <a href="#">Gbp4</a> , <a href="#">Ifitm3</a> , <a href="#">Tlr2</a> , <a href="#">Ripk3</a> , <a href="#">Lbp</a> , <a href="#">Psm3</a> , <a href="#">Ripk1</a> , <a href="#">Psm2</a> , <a href="#">Il1b</a> , <a href="#">Calr</a> , <a href="#">Eif4a3</a> , <a href="#">Psm9</a> , <a href="#">Sar1b</a> , <a href="#">Fcgr2b</a> , <a href="#">Socs3</a> , <a href="#">Eif4e3</a> , <a href="#">Stat3</a> , <a href="#">Ptafr</a> , <a href="#">Gbp5</a> , <a href="#">Irf8</a> , <a href="#">Jak3</a> , <a href="#">Cybb</a> , <a href="#">Lgmn</a> , <a href="#">Lilrb4</a> , <a href="#">Zbp1</a> , <a href="#">Ripk2</a> , <a href="#">C3</a> , <a href="#">Ncf1</a> , <a href="#">Il1r2</a> , <a href="#">Sh3kbp1</a> , <a href="#">C1s</a> | <a href="#">Immune System</a>                                                                                                            |
| 1.7e-06                                                                                  | <a href="#">Eif4a3</a> , <a href="#">Csf2rb</a> , <a href="#">Gbp2</a> , <a href="#">Stat1</a> , <a href="#">Il5ra</a> , <a href="#">Socs3</a> , <a href="#">Eif4e3</a> , <a href="#">Stat3</a> , <a href="#">Ptafr</a> , <a href="#">Irf8</a> , <a href="#">Gbp5</a> , <a href="#">Jak3</a> , <a href="#">Il6</a> , <a href="#">Lyn</a> , <a href="#">Ifitm1</a> , <a href="#">Ifnar2</a> , <a href="#">Ripk2</a> , <a href="#">Il1a</a> , <a href="#">Icam1</a> , <a href="#">Gbp4</a> , <a href="#">Ifitm3</a> , <a href="#">Il1r2</a> , <a href="#">Il1b</a>                                                                                                                                                                                                                                                                                                                                                                                                                                                                                                                                                                                                                                                            | <a href="#">Cytokine Signaling in Immune system</a>                                                                                      |
| 6.8e-06                                                                                  | <a href="#">Lyn</a> , <a href="#">Csf2rb</a> , <a href="#">Ripk2</a> , <a href="#">Il1a</a> , <a href="#">Stat1</a> , <a href="#">Il5ra</a> , <a href="#">Socs3</a> , <a href="#">Stat3</a> , <a href="#">Il1r2</a> , <a href="#">Jak3</a> , <a href="#">Il1b</a> , <a href="#">Il6</a>                                                                                                                                                                                                                                                                                                                                                                                                                                                                                                                                                                                                                                                                                                                                                                                                                                                                                                                                     | <a href="#">Signaling by Interleukins</a>                                                                                                |
| 1.2e-05                                                                                  | <a href="#">Il1a</a> , <a href="#">Il1r2</a> , <a href="#">Il1b</a>                                                                                                                                                                                                                                                                                                                                                                                                                                                                                                                                                                                                                                                                                                                                                                                                                                                                                                                                                                                                                                                                                                                                                         | <a href="#">Interleukin-1 receptor type 2 binds Interleukin 1</a>                                                                        |
| 1.2e-05                                                                                  | <a href="#">Zbp1</a> , <a href="#">Ripk1</a> , <a href="#">Ripk3</a>                                                                                                                                                                                                                                                                                                                                                                                                                                                                                                                                                                                                                                                                                                                                                                                                                                                                                                                                                                                                                                                                                                                                                        | <a href="#">DAI recruits RIP1 and RIP3</a>                                                                                               |
| 7.7e-05                                                                                  | <a href="#">Socs3</a> , <a href="#">Stat3</a> , <a href="#">Stat1</a> , <a href="#">Il6</a>                                                                                                                                                                                                                                                                                                                                                                                                                                                                                                                                                                                                                                                                                                                                                                                                                                                                                                                                                                                                                                                                                                                                 | <a href="#">Interleukin-6 signaling</a>                                                                                                  |
| 1.0e-04                                                                                  | <a href="#">Psm3</a> , <a href="#">Dapk2</a> , <a href="#">Psm9</a> , <a href="#">Ptk2</a> , <a href="#">H13</a> , <a href="#">Tnf</a> , <a href="#">Dynll1</a> , <a href="#">Vim</a> , <a href="#">Psm3</a> , <a href="#">Ripk1</a> , <a href="#">Psm2</a> , <a href="#">Apaf1</a>                                                                                                                                                                                                                                                                                                                                                                                                                                                                                                                                                                                                                                                                                                                                                                                                                                                                                                                                         | <a href="#">Apoptosis</a>                                                                                                                |
| 1.1e-04                                                                                  | <a href="#">Ncf1</a> , <a href="#">Cyba</a> , <a href="#">Cybb</a>                                                                                                                                                                                                                                                                                                                                                                                                                                                                                                                                                                                                                                                                                                                                                                                                                                                                                                                                                                                                                                                                                                                                                          | <a href="#">Alkalization of the phagosomal lumen by NOX2</a>                                                                             |
| 5.2e-04                                                                                  | <a href="#">Cd14</a> , <a href="#">Lbp</a>                                                                                                                                                                                                                                                                                                                                                                                                                                                                                                                                                                                                                                                                                                                                                                                                                                                                                                                                                                                                                                                                                                                                                                                  | <a href="#">LPS transferred from LBP carrier to CD14</a>                                                                                 |
| 5.2e-04                                                                                  | <a href="#">Cd14</a> , <a href="#">Lbp</a>                                                                                                                                                                                                                                                                                                                                                                                                                                                                                                                                                                                                                                                                                                                                                                                                                                                                                                                                                                                                                                                                                                                                                                                  | <a href="#">GPI-bound CD14 binds LPS</a>                                                                                                 |
| 5.2e-04                                                                                  | <a href="#">Cd14</a> , <a href="#">Lbp</a>                                                                                                                                                                                                                                                                                                                                                                                                                                                                                                                                                                                                                                                                                                                                                                                                                                                                                                                                                                                                                                                                                                                                                                                  | <a href="#">Secreted CD14 binds LPS</a>                                                                                                  |
| 5.2e-04                                                                                  | <a href="#">Stat3</a> , <a href="#">Stat1</a>                                                                                                                                                                                                                                                                                                                                                                                                                                                                                                                                                                                                                                                                                                                                                                                                                                                                                                                                                                                                                                                                                                                                                                               | <a href="#">Phosphorylated STAT1, STAT3 form dimers</a>                                                                                  |
| 5.2e-04                                                                                  | <a href="#">Stat3</a> , <a href="#">Stat1</a>                                                                                                                                                                                                                                                                                                                                                                                                                                                                                                                                                                                                                                                                                                                                                                                                                                                                                                                                                                                                                                                                                                                                                                               | <a href="#">STAT1/3 dimers translocate to the nucleus</a>                                                                                |
| 6.1e-04                                                                                  | <a href="#">Stat3</a> , <a href="#">Stat1</a> , <a href="#">Il6</a>                                                                                                                                                                                                                                                                                                                                                                                                                                                                                                                                                                                                                                                                                                                                                                                                                                                                                                                                                                                                                                                                                                                                                         | <a href="#">STATs bind gp130 phosphotyrosines</a>                                                                                        |
| 6.1e-04                                                                                  | <a href="#">Stat3</a> , <a href="#">Stat1</a> , <a href="#">Il6</a>                                                                                                                                                                                                                                                                                                                                                                                                                                                                                                                                                                                                                                                                                                                                                                                                                                                                                                                                                                                                                                                                                                                                                         | <a href="#">Tyrosine phosphorylation of STATs by IL6 receptor</a>                                                                        |
| 6.1e-04                                                                                  | <a href="#">Stat3</a> , <a href="#">Stat1</a> , <a href="#">Il6</a>                                                                                                                                                                                                                                                                                                                                                                                                                                                                                                                                                                                                                                                                                                                                                                                                                                                                                                                                                                                                                                                                                                                                                         | <a href="#">Phosphorylated STATs are released</a>                                                                                        |
| 6.1e-04                                                                                  | <a href="#">Stat3</a> , <a href="#">Stat1</a> , <a href="#">Il6</a>                                                                                                                                                                                                                                                                                                                                                                                                                                                                                                                                                                                                                                                                                                                                                                                                                                                                                                                                                                                                                                                                                                                                                         | <a href="#">Serine phosphorylation of STATs</a>                                                                                          |
| 6.1e-04                                                                                  | <a href="#">Ncf1</a> , <a href="#">Cyba</a> , <a href="#">Cybb</a>                                                                                                                                                                                                                                                                                                                                                                                                                                                                                                                                                                                                                                                                                                                                                                                                                                                                                                                                                                                                                                                                                                                                                          | <a href="#">Cross-presentation of particulate exogenous antigens (phagosomes)</a>                                                        |
| 1.5e-03                                                                                  | <a href="#">Psm3</a> , <a href="#">Calr</a> , <a href="#">Cyba</a> , <a href="#">Psm9</a> , <a href="#">Psm3</a> , <a href="#">Ncf1</a> , <a href="#">Psm2</a> , <a href="#">Sec61a2</a> , <a href="#">Cybb</a>                                                                                                                                                                                                                                                                                                                                                                                                                                                                                                                                                                                                                                                                                                                                                                                                                                                                                                                                                                                                             | <a href="#">Antigen processing-Cross presentation</a>                                                                                    |
| 1.5e-03                                                                                  | <a href="#">Il1a</a> , <a href="#">Il1b</a>                                                                                                                                                                                                                                                                                                                                                                                                                                                                                                                                                                                                                                                                                                                                                                                                                                                                                                                                                                                                                                                                                                                                                                                 | <a href="#">Interleukin-1 receptor type 1 binds Interleukin 1</a>                                                                        |
| 1.5e-03                                                                                  | <a href="#">Il1a</a> , <a href="#">Il1b</a>                                                                                                                                                                                                                                                                                                                                                                                                                                                                                                                                                                                                                                                                                                                                                                                                                                                                                                                                                                                                                                                                                                                                                                                 | <a href="#">Interleukin-1 family are secreted</a>                                                                                        |
| 1.7e-03                                                                                  | <a href="#">Lyn</a> , <a href="#">Socs3</a> , <a href="#">Stat3</a> , <a href="#">Stat1</a>                                                                                                                                                                                                                                                                                                                                                                                                                                                                                                                                                                                                                                                                                                                                                                                                                                                                                                                                                                                                                                                                                                                                 | <a href="#">Growth hormone receptor signaling</a>                                                                                        |
| 1.7e-03                                                                                  | <a href="#">Zbp1</a> , <a href="#">Ripk1</a> , <a href="#">Ripk3</a>                                                                                                                                                                                                                                                                                                                                                                                                                                                                                                                                                                                                                                                                                                                                                                                                                                                                                                                                                                                                                                                                                                                                                        | <a href="#">RIP-mediated NFkB activation via DAI</a>                                                                                     |
| 1.9e-03                                                                                  | <a href="#">Ifnar2</a> , <a href="#">Ifitm1</a> , <a href="#">Eif4a3</a> , <a href="#">Icam1</a> , <a href="#">Gbp2</a> , <a href="#">Ifitm3</a> , <a href="#">Gbp4</a> , <a href="#">Stat1</a> , <a href="#">Socs3</a> , <a href="#">Eif4e3</a> , <a href="#">Ptafr</a> , <a href="#">Irf8</a> , <a href="#">Gbp5</a>                                                                                                                                                                                                                                                                                                                                                                                                                                                                                                                                                                                                                                                                                                                                                                                                                                                                                                      | <a href="#">Interferon Signaling</a>                                                                                                     |
| 2.2e-03                                                                                  | <a href="#">Lyn</a> , <a href="#">Stat3</a> , <a href="#">Stat1</a>                                                                                                                                                                                                                                                                                                                                                                                                                                                                                                                                                                                                                                                                                                                                                                                                                                                                                                                                                                                                                                                                                                                                                         | <a href="#">Recruitment of STATs</a>                                                                                                     |
| 2.2e-03                                                                                  | <a href="#">Lyn</a> , <a href="#">Stat3</a> , <a href="#">Stat1</a>                                                                                                                                                                                                                                                                                                                                                                                                                                                                                                                                                                                                                                                                                                                                                                                                                                                                                                                                                                                                                                                                                                                                                         | <a href="#">Phosphorylation of STATs</a>                                                                                                 |
| 2.2e-03                                                                                  | <a href="#">Lyn</a> , <a href="#">Stat3</a> , <a href="#">Stat1</a>                                                                                                                                                                                                                                                                                                                                                                                                                                                                                                                                                                                                                                                                                                                                                                                                                                                                                                                                                                                                                                                                                                                                                         | <a href="#">Dimerization of STATs</a>                                                                                                    |
| 2.2e-03                                                                                  | <a href="#">Lyn</a> , <a href="#">Stat3</a> , <a href="#">Stat1</a>                                                                                                                                                                                                                                                                                                                                                                                                                                                                                                                                                                                                                                                                                                                                                                                                                                                                                                                                                                                                                                                                                                                                                         | <a href="#">Disassociation and translocation of STATs to the nucleus</a>                                                                 |
| 2.9e-03                                                                                  | <a href="#">Lyn</a> , <a href="#">Itga2</a> , <a href="#">Fcer1g</a>                                                                                                                                                                                                                                                                                                                                                                                                                                                                                                                                                                                                                                                                                                                                                                                                                                                                                                                                                                                                                                                                                                                                                        | <a href="#">Platelet Adhesion to exposed collagen</a>                                                                                    |
| 2.9e-03                                                                                  | <a href="#">Zbp1</a> , <a href="#">Ripk1</a> , <a href="#">Ripk3</a>                                                                                                                                                                                                                                                                                                                                                                                                                                                                                                                                                                                                                                                                                                                                                                                                                                                                                                                                                                                                                                                                                                                                                        | <a href="#">DAI mediated induction of type I IFNs</a>                                                                                    |
| 2.9e-03                                                                                  | <a href="#">Zbp1</a> , <a href="#">Ripk1</a> , <a href="#">Ripk3</a>                                                                                                                                                                                                                                                                                                                                                                                                                                                                                                                                                                                                                                                                                                                                                                                                                                                                                                                                                                                                                                                                                                                                                        | <a href="#">Cytosolic sensors of pathogen-associated DNA</a>                                                                             |
| 3.0e-03                                                                                  | <a href="#">Plat</a> , <a href="#">Pdgc</a>                                                                                                                                                                                                                                                                                                                                                                                                                                                                                                                                                                                                                                                                                                                                                                                                                                                                                                                                                                                                                                                                                                                                                                                 | <a href="#">Extracellular processing of novel PDGFs</a>                                                                                  |
| 3.0e-03                                                                                  | <a href="#">Cd47</a> , <a href="#">Ptk2</a>                                                                                                                                                                                                                                                                                                                                                                                                                                                                                                                                                                                                                                                                                                                                                                                                                                                                                                                                                                                                                                                                                                                                                                                 | <a href="#">Phosphorylation of ITIM in SIRP alpha</a>                                                                                    |
| 3.0e-03                                                                                  | <a href="#">Tyrobp</a> , <a href="#">Sema6d</a>                                                                                                                                                                                                                                                                                                                                                                                                                                                                                                                                                                                                                                                                                                                                                                                                                                                                                                                                                                                                                                                                                                                                                                             | <a href="#">Sema6D binds PlexinA1-Trem2-DAP12</a>                                                                                        |
| 3.0e-03                                                                                  | <a href="#">Lyn</a> , <a href="#">Fcer1g</a>                                                                                                                                                                                                                                                                                                                                                                                                                                                                                                                                                                                                                                                                                                                                                                                                                                                                                                                                                                                                                                                                                                                                                                                | <a href="#">GPVI binds Fyn and Lyn</a>                                                                                                   |
| 3.0e-03                                                                                  | <a href="#">Il1a</a> , <a href="#">Il1b</a>                                                                                                                                                                                                                                                                                                                                                                                                                                                                                                                                                                                                                                                                                                                                                                                                                                                                                                                                                                                                                                                                                                                                                                                 | <a href="#">Interleukin-1 receptor type 1: Interleukin 1 binds Interleukin-1 receptor accessory protein, membrane associated isoform</a> |
| 3.0e-03                                                                                  | <a href="#">Il1a</a> , <a href="#">Il1b</a>                                                                                                                                                                                                                                                                                                                                                                                                                                                                                                                                                                                                                                                                                                                                                                                                                                                                                                                                                                                                                                                                                                                                                                                 | <a href="#">Interleukin-1 family precursors are cleaved by caspase-1</a>                                                                 |
| 3.0e-03                                                                                  | <a href="#">Il1a</a> , <a href="#">Il1b</a>                                                                                                                                                                                                                                                                                                                                                                                                                                                                                                                                                                                                                                                                                                                                                                                                                                                                                                                                                                                                                                                                                                                                                                                 | <a href="#">Interleukin-1 processing</a>                                                                                                 |
| 3.0e-03                                                                                  | <a href="#">Il5ra</a> , <a href="#">Csf2rb</a>                                                                                                                                                                                                                                                                                                                                                                                                                                                                                                                                                                                                                                                                                                                                                                                                                                                                                                                                                                                                                                                                                                                                                                              | <a href="#">Interleukin-5:Interleukin-5 receptor alpha binds IL3RB:JAK2</a>                                                              |
| 3.4e-03                                                                                  | <a href="#">Xpo1</a> , <a href="#">Psm3</a> , <a href="#">Psm3</a> , <a href="#">Dcp2</a> , <a href="#">Psm2</a> , <a href="#">Psm9</a> , <a href="#">Dis3</a>                                                                                                                                                                                                                                                                                                                                                                                                                                                                                                                                                                                                                                                                                                                                                                                                                                                                                                                                                                                                                                                              | <a href="#">Regulation of mRNA Stability by Proteins that Bind AU-rich Elements</a>                                                      |
| 5.0e-03                                                                                  | <a href="#">Ripk1</a> , <a href="#">Tnf</a>                                                                                                                                                                                                                                                                                                                                                                                                                                                                                                                                                                                                                                                                                                                                                                                                                                                                                                                                                                                                                                                                                                                                                                                 | <a href="#">TRADD:TRAF2:RIP1 complex dissociates from the TNF-alpha:TNF-R1 complex.</a>                                                  |
| 5.0e-03                                                                                  | <a href="#">Ripk1</a> , <a href="#">Tnf</a>                                                                                                                                                                                                                                                                                                                                                                                                                                                                                                                                                                                                                                                                                                                                                                                                                                                                                                                                                                                                                                                                                                                                                                                 | <a href="#">TNF:TNF-R1 binds TRADD, TRAF2 and RIP Complex</a>                                                                            |
| 5.0e-03                                                                                  | <a href="#">Ifitm1</a> , <a href="#">C3</a>                                                                                                                                                                                                                                                                                                                                                                                                                                                                                                                                                                                                                                                                                                                                                                                                                                                                                                                                                                                                                                                                                                                                                                                 | <a href="#">C3d-complexed antigen binds to complement receptor</a>                                                                       |
| 5.0e-03                                                                                  | <a href="#">Il1a</a> , <a href="#">Il1b</a>                                                                                                                                                                                                                                                                                                                                                                                                                                                                                                                                                                                                                                                                                                                                                                                                                                                                                                                                                                                                                                                                                                                                                                                 | <a href="#">IL1R1:IL1:IL1RAP binds MYD88 homodimer</a>                                                                                   |

Table S3, continued.

| Biological pathways predicted to be regulated by DSS, continued                          |                                                                                                                                                                                                                                                                                                                                                                                                                                                                                                                                                                                                                                                                                                                                                                                                                                                                                                                                                                                                                                                                               |                                                                                               |
|------------------------------------------------------------------------------------------|-------------------------------------------------------------------------------------------------------------------------------------------------------------------------------------------------------------------------------------------------------------------------------------------------------------------------------------------------------------------------------------------------------------------------------------------------------------------------------------------------------------------------------------------------------------------------------------------------------------------------------------------------------------------------------------------------------------------------------------------------------------------------------------------------------------------------------------------------------------------------------------------------------------------------------------------------------------------------------------------------------------------------------------------------------------------------------|-----------------------------------------------------------------------------------------------|
| Statistical likelihood that the indicated pathway is regulated by DSS ( <i>P</i> -value) | Genes that map to this pathway                                                                                                                                                                                                                                                                                                                                                                                                                                                                                                                                                                                                                                                                                                                                                                                                                                                                                                                                                                                                                                                | Name of this pathway                                                                          |
| 5.3e-03                                                                                  | <a href="#">Cd47</a> , <a href="#">Tyrobp</a> , <a href="#">Ptk2</a>                                                                                                                                                                                                                                                                                                                                                                                                                                                                                                                                                                                                                                                                                                                                                                                                                                                                                                                                                                                                          | <a href="#">Signal regulatory protein (SIRP) family interactions</a>                          |
| 5.8e-03                                                                                  | <a href="#">Atic</a> , <a href="#">Ada</a> , <a href="#">Xdh</a> , <a href="#">Gda</a>                                                                                                                                                                                                                                                                                                                                                                                                                                                                                                                                                                                                                                                                                                                                                                                                                                                                                                                                                                                        | <a href="#">Purine metabolism</a>                                                             |
| 6.4e-03                                                                                  | <a href="#">Il5ra</a> , <a href="#">Csf2rb</a> , <a href="#">Jak3</a>                                                                                                                                                                                                                                                                                                                                                                                                                                                                                                                                                                                                                                                                                                                                                                                                                                                                                                                                                                                                         | <a href="#">Phosphorylated SHC1 recruits GRB2:GAB2</a>                                        |
| 6.4e-03                                                                                  | <a href="#">Il5ra</a> , <a href="#">Csf2rb</a> , <a href="#">Jak3</a>                                                                                                                                                                                                                                                                                                                                                                                                                                                                                                                                                                                                                                                                                                                                                                                                                                                                                                                                                                                                         | <a href="#">Phosphorylated SHC recruits GRB2:SOS1</a>                                         |
| 6.4e-03                                                                                  | <a href="#">Il5ra</a> , <a href="#">Csf2rb</a> , <a href="#">Jak3</a>                                                                                                                                                                                                                                                                                                                                                                                                                                                                                                                                                                                                                                                                                                                                                                                                                                                                                                                                                                                                         | <a href="#">SHC1 mediates cytokine-induced phosphorylation of GAB2</a>                        |
| 6.4e-03                                                                                  | <a href="#">Il5ra</a> , <a href="#">Csf2rb</a> , <a href="#">Jak3</a>                                                                                                                                                                                                                                                                                                                                                                                                                                                                                                                                                                                                                                                                                                                                                                                                                                                                                                                                                                                                         | <a href="#">Phosphorylated SHC1 recruits SHIP</a>                                             |
| 6.4e-03                                                                                  | <a href="#">Il5ra</a> , <a href="#">Csf2rb</a> , <a href="#">Jak3</a>                                                                                                                                                                                                                                                                                                                                                                                                                                                                                                                                                                                                                                                                                                                                                                                                                                                                                                                                                                                                         | <a href="#">The SHC1:SHIP1 complex is stabilized by GRB2</a>                                  |
| 7.4e-03                                                                                  | <a href="#">Lyn</a> , <a href="#">Fcer1g</a>                                                                                                                                                                                                                                                                                                                                                                                                                                                                                                                                                                                                                                                                                                                                                                                                                                                                                                                                                                                                                                  | <a href="#">Binding of GPVI:Fc Epsilon R1 gamma receptor complex with collagen</a>            |
| 7.4e-03                                                                                  | <a href="#">Lyn</a> , <a href="#">Fcer1g</a>                                                                                                                                                                                                                                                                                                                                                                                                                                                                                                                                                                                                                                                                                                                                                                                                                                                                                                                                                                                                                                  | <a href="#">Fyn/Lyn-mediated phosphorylation of FcR1 gamma</a>                                |
| 7.4e-03                                                                                  | <a href="#">Il1a</a> , <a href="#">Il1b</a>                                                                                                                                                                                                                                                                                                                                                                                                                                                                                                                                                                                                                                                                                                                                                                                                                                                                                                                                                                                                                                   | <a href="#">IL1R1:IL1:IL1RAP:MYD88 homodimer binds IRAK4</a>                                  |
| 7.4e-03                                                                                  | <a href="#">Stat3</a> , <a href="#">Stat1</a>                                                                                                                                                                                                                                                                                                                                                                                                                                                                                                                                                                                                                                                                                                                                                                                                                                                                                                                                                                                                                                 | <a href="#">JAK2 phosphorylates STAT1/STAT3</a>                                               |
| 7.4e-03                                                                                  | <a href="#">Stat3</a> , <a href="#">Stat1</a>                                                                                                                                                                                                                                                                                                                                                                                                                                                                                                                                                                                                                                                                                                                                                                                                                                                                                                                                                                                                                                 | <a href="#">JAK2 binds STAT1/3</a>                                                            |
| 7.4e-03                                                                                  | <a href="#">Socs3</a> , <a href="#">Ptafr</a> , <a href="#">Irf8</a> , <a href="#">Icam1</a> , <a href="#">Gbp5</a> , <a href="#">Gbp2</a> , <a href="#">Gbp4</a> , <a href="#">Stat1</a>                                                                                                                                                                                                                                                                                                                                                                                                                                                                                                                                                                                                                                                                                                                                                                                                                                                                                     | <a href="#">Interferon gamma signaling</a>                                                    |
| 7.5e-03                                                                                  | <a href="#">Il5ra</a> , <a href="#">Csf2rb</a> , <a href="#">Jak3</a>                                                                                                                                                                                                                                                                                                                                                                                                                                                                                                                                                                                                                                                                                                                                                                                                                                                                                                                                                                                                         | <a href="#">SOS1 activates H-Ras</a>                                                          |
| 9.2e-03                                                                                  | <a href="#">Ifnar2</a> , <a href="#">Ifitm1</a> , <a href="#">Socs3</a> , <a href="#">Irf8</a> , <a href="#">Gbp2</a> , <a href="#">Ifitm3</a> , <a href="#">Stat1</a>                                                                                                                                                                                                                                                                                                                                                                                                                                                                                                                                                                                                                                                                                                                                                                                                                                                                                                        | <a href="#">Interferon alpha/beta signaling</a>                                               |
| 1.9e-07                                                                                  | <a href="#">Acss2</a> , <a href="#">Rbp2</a> , <a href="#">Prkar2b</a> , <a href="#">Ddc</a> , <a href="#">Acer1</a> , <a href="#">Slc27a1</a> , <a href="#">Pccb</a> , <a href="#">Pfkf</a> , <a href="#">Itp2</a> , <a href="#">Pdk2</a> , <a href="#">Pdxk</a> , <a href="#">Adh1</a> , <a href="#">Alb</a> , <a href="#">Fmo1</a> , <a href="#">Cyp2s1</a> , <a href="#">Gpt</a> , <a href="#">Acsl1</a> , <a href="#">Aldh6a1</a> , <a href="#">Papss1</a> , <a href="#">Hexb</a> , <a href="#">Lrat</a> , <a href="#">Maob</a> , <a href="#">Gnb5</a> , <a href="#">Glul</a> , <a href="#">Clps</a> , <a href="#">Sult2b1</a> , <a href="#">Slc46a1</a> , <a href="#">Cth</a> , <a href="#">Hk1</a> , <a href="#">Slc6a8</a> , <a href="#">Pnp0</a> , <a href="#">Nnt</a> , <a href="#">Csad</a> , <a href="#">Gba2</a> , <a href="#">Gstm1</a> , <a href="#">Hsd3b7</a> , <a href="#">Itp1</a> , <a href="#">Cps1</a> , <a href="#">Sult1a1</a> , <a href="#">Cdo1</a> , <a href="#">Plcb1</a> , <a href="#">Ccbl1</a> , <a href="#">Pfkfb4</a> , <a href="#">Pck1</a> | <a href="#">Metabolism</a>                                                                    |
| 2.7e-05                                                                                  | <a href="#">Stim1</a> , <a href="#">Itp2</a> , <a href="#">Itp1</a>                                                                                                                                                                                                                                                                                                                                                                                                                                                                                                                                                                                                                                                                                                                                                                                                                                                                                                                                                                                                           | <a href="#">Oligomerization of STIM1</a>                                                      |
| 2.3e-04                                                                                  | <a href="#">Rbp2</a> , <a href="#">Lrat</a> , <a href="#">Clps</a>                                                                                                                                                                                                                                                                                                                                                                                                                                                                                                                                                                                                                                                                                                                                                                                                                                                                                                                                                                                                            | <a href="#">Vitamin A uptake in enterocytes</a>                                               |
| 3.6e-04                                                                                  | <a href="#">Cth</a> , <a href="#">Csad</a> , <a href="#">Cdo1</a>                                                                                                                                                                                                                                                                                                                                                                                                                                                                                                                                                                                                                                                                                                                                                                                                                                                                                                                                                                                                             | <a href="#">Degradation of cysteine and homocysteine</a>                                      |
| 3.6e-04                                                                                  | <a href="#">Pdxk</a> , <a href="#">Pnp0</a>                                                                                                                                                                                                                                                                                                                                                                                                                                                                                                                                                                                                                                                                                                                                                                                                                                                                                                                                                                                                                                   | <a href="#">Vitamins B6 activation to pyridoxal phosphate</a>                                 |
| 3.6e-04                                                                                  | <a href="#">Rbp2</a> , <a href="#">Lrat</a>                                                                                                                                                                                                                                                                                                                                                                                                                                                                                                                                                                                                                                                                                                                                                                                                                                                                                                                                                                                                                                   | <a href="#">Esterification of retinol</a>                                                     |
| 5.3e-04                                                                                  | <a href="#">Stim1</a> , <a href="#">Itp2</a> , <a href="#">Itp1</a>                                                                                                                                                                                                                                                                                                                                                                                                                                                                                                                                                                                                                                                                                                                                                                                                                                                                                                                                                                                                           | <a href="#">Elevation of cytosolic Ca2+ levels</a>                                            |
| 1.1e-03                                                                                  | <a href="#">Itp2</a> , <a href="#">Itp1</a>                                                                                                                                                                                                                                                                                                                                                                                                                                                                                                                                                                                                                                                                                                                                                                                                                                                                                                                                                                                                                                   | <a href="#">Transport of Ca++ from platelet dense tubular system to cytoplasm</a>             |
| 1.1e-03                                                                                  | <a href="#">Itp2</a> , <a href="#">Itp1</a>                                                                                                                                                                                                                                                                                                                                                                                                                                                                                                                                                                                                                                                                                                                                                                                                                                                                                                                                                                                                                                   | <a href="#">Binding of IP3 to IP3 receptor</a>                                                |
| 1.1e-03                                                                                  | <a href="#">Itp2</a> , <a href="#">Itp1</a>                                                                                                                                                                                                                                                                                                                                                                                                                                                                                                                                                                                                                                                                                                                                                                                                                                                                                                                                                                                                                                   | <a href="#">IP3 binds to the IP3 receptor, opening the endoplasmic reticulum Ca2+ channel</a> |
| 1.1e-03                                                                                  | <a href="#">Itp2</a> , <a href="#">Itp1</a>                                                                                                                                                                                                                                                                                                                                                                                                                                                                                                                                                                                                                                                                                                                                                                                                                                                                                                                                                                                                                                   | <a href="#">Release of calcium from intracellular stores by IP3 receptor activation</a>       |
| 1.1e-03                                                                                  | <a href="#">Itp2</a> , <a href="#">Itp1</a>                                                                                                                                                                                                                                                                                                                                                                                                                                                                                                                                                                                                                                                                                                                                                                                                                                                                                                                                                                                                                                   | <a href="#">Opening of ER calcium channels by activated PKA</a>                               |
| 1.2e-03                                                                                  | <a href="#">Itp2</a> , <a href="#">Itp1</a> , <a href="#">Prkcd</a> , <a href="#">Dgkh</a>                                                                                                                                                                                                                                                                                                                                                                                                                                                                                                                                                                                                                                                                                                                                                                                                                                                                                                                                                                                    | <a href="#">Effects of PIP2 hydrolysis</a>                                                    |
| 1.2e-03                                                                                  | <a href="#">Fmo1</a> , <a href="#">Acss2</a> , <a href="#">Gstm1</a> , <a href="#">Cyp2s1</a> , <a href="#">Sult1a1</a> , <a href="#">Sult2b1</a> , <a href="#">Papss1</a> , <a href="#">Adh1</a> , <a href="#">Maob</a>                                                                                                                                                                                                                                                                                                                                                                                                                                                                                                                                                                                                                                                                                                                                                                                                                                                      | <a href="#">Biological oxidations</a>                                                         |
| 1.3e-03                                                                                  | <a href="#">Itp2</a> , <a href="#">Prkar2b</a> , <a href="#">Plcb1</a> , <a href="#">Itp1</a> , <a href="#">Prkcd</a>                                                                                                                                                                                                                                                                                                                                                                                                                                                                                                                                                                                                                                                                                                                                                                                                                                                                                                                                                         | <a href="#">PLC beta mediated events</a>                                                      |
| 1.4e-03                                                                                  | <a href="#">Itp2</a> , <a href="#">Prkar2b</a> , <a href="#">Plcb1</a> , <a href="#">Itp1</a> , <a href="#">Prkcd</a>                                                                                                                                                                                                                                                                                                                                                                                                                                                                                                                                                                                                                                                                                                                                                                                                                                                                                                                                                         | <a href="#">G-protein mediated events</a>                                                     |
| 1.7e-03                                                                                  | <a href="#">Sult2b1</a> , <a href="#">Papss1</a> , <a href="#">Sult1a1</a>                                                                                                                                                                                                                                                                                                                                                                                                                                                                                                                                                                                                                                                                                                                                                                                                                                                                                                                                                                                                    | <a href="#">Cytosolic sulfonation of small molecules</a>                                      |
| 2.7e-03                                                                                  | <a href="#">Itp2</a> , <a href="#">Prkar2b</a> , <a href="#">Itp1</a> , <a href="#">Prkcd</a>                                                                                                                                                                                                                                                                                                                                                                                                                                                                                                                                                                                                                                                                                                                                                                                                                                                                                                                                                                                 | <a href="#">DAG and IP3 signaling</a>                                                         |
| 3.2e-03                                                                                  | <a href="#">Glul</a> , <a href="#">Ccbl1</a> , <a href="#">Gpt</a>                                                                                                                                                                                                                                                                                                                                                                                                                                                                                                                                                                                                                                                                                                                                                                                                                                                                                                                                                                                                            | <a href="#">Amino acid synthesis and interconversion (transamination)</a>                     |
| 3.4e-03                                                                                  | <a href="#">Itp2</a> , <a href="#">Prkar2b</a> , <a href="#">Itp1</a> , <a href="#">Prkcd</a>                                                                                                                                                                                                                                                                                                                                                                                                                                                                                                                                                                                                                                                                                                                                                                                                                                                                                                                                                                                 | <a href="#">PLC-gamma1 signalling</a>                                                         |
| 3.4e-03                                                                                  | <a href="#">Itp2</a> , <a href="#">Prkar2b</a> , <a href="#">Itp1</a> , <a href="#">Prkcd</a>                                                                                                                                                                                                                                                                                                                                                                                                                                                                                                                                                                                                                                                                                                                                                                                                                                                                                                                                                                                 | <a href="#">EGFR interacts with phospholipase C-gamma</a>                                     |
| 3.4e-03                                                                                  | <a href="#">Ddc</a> , <a href="#">Glul</a> , <a href="#">Cps1</a> , <a href="#">Gpt</a> , <a href="#">Cdo1</a> , <a href="#">Aldh6a1</a> , <a href="#">Cth</a> , <a href="#">Slc6a8</a> , <a href="#">Ccbl1</a> , <a href="#">Csad</a>                                                                                                                                                                                                                                                                                                                                                                                                                                                                                                                                                                                                                                                                                                                                                                                                                                        | <a href="#">Metabolism of amino acids and derivatives</a>                                     |
| 3.5e-03                                                                                  | <a href="#">Smad7</a> , <a href="#">Smad6</a>                                                                                                                                                                                                                                                                                                                                                                                                                                                                                                                                                                                                                                                                                                                                                                                                                                                                                                                                                                                                                                 | <a href="#">I-SMAD competes with SMAD2/3 for type I receptor (TGFB1)</a>                      |
| 3.5e-03                                                                                  | <a href="#">Smad7</a> , <a href="#">Smad6</a>                                                                                                                                                                                                                                                                                                                                                                                                                                                                                                                                                                                                                                                                                                                                                                                                                                                                                                                                                                                                                                 | <a href="#">I-Smad competes with Co-Smad for R-Smad1/5/8</a>                                  |
| 3.5e-03                                                                                  | <a href="#">Itp2</a> , <a href="#">Prkar2b</a> , <a href="#">Itp1</a> , <a href="#">Prkcd</a> , <a href="#">Fgfr3</a>                                                                                                                                                                                                                                                                                                                                                                                                                                                                                                                                                                                                                                                                                                                                                                                                                                                                                                                                                         | <a href="#">Phospholipase C-mediated cascade</a>                                              |
| 3.8e-03                                                                                  | <a href="#">Itp2</a> , <a href="#">Prkar2b</a> , <a href="#">Itp1</a> , <a href="#">Prkcd</a>                                                                                                                                                                                                                                                                                                                                                                                                                                                                                                                                                                                                                                                                                                                                                                                                                                                                                                                                                                                 | <a href="#">PLCG1 events in ERBB2 signaling</a>                                               |
| 4.1e-03                                                                                  | <a href="#">Itp2</a> , <a href="#">Prkar2b</a> , <a href="#">Plcb1</a> , <a href="#">Itp1</a> , <a href="#">Prkcd</a> , <a href="#">Gnb5</a>                                                                                                                                                                                                                                                                                                                                                                                                                                                                                                                                                                                                                                                                                                                                                                                                                                                                                                                                  | <a href="#">Opioid Signalling</a>                                                             |
| 5.2e-03                                                                                  | <a href="#">Kit</a> , <a href="#">Grb7</a>                                                                                                                                                                                                                                                                                                                                                                                                                                                                                                                                                                                                                                                                                                                                                                                                                                                                                                                                                                                                                                    | <a href="#">Interaction of other adapter proteins with p-KIT</a>                              |
| 5.3e-03                                                                                  | <a href="#">Rhou</a> , <a href="#">Rhot2</a> , <a href="#">Rhoc</a>                                                                                                                                                                                                                                                                                                                                                                                                                                                                                                                                                                                                                                                                                                                                                                                                                                                                                                                                                                                                           | <a href="#">Rho GTPase:GTP activates downstream effectors</a>                                 |
| 5.3e-03                                                                                  | <a href="#">Stim1</a> , <a href="#">Itp2</a> , <a href="#">Itp1</a>                                                                                                                                                                                                                                                                                                                                                                                                                                                                                                                                                                                                                                                                                                                                                                                                                                                                                                                                                                                                           | <a href="#">Platelet calcium homeostasis</a>                                                  |
| 6.2e-03                                                                                  | <a href="#">Slc46a1</a> , <a href="#">Steap3</a> , <a href="#">Atp6v1e1</a> , <a href="#">Mcoln1</a>                                                                                                                                                                                                                                                                                                                                                                                                                                                                                                                                                                                                                                                                                                                                                                                                                                                                                                                                                                          | <a href="#">Iron uptake and transport</a>                                                     |
| 8.5e-03                                                                                  | <a href="#">Nr4a1</a> , <a href="#">Itp2</a> , <a href="#">Prkar2b</a> , <a href="#">Itp1</a> , <a href="#">Prkcd</a> , <a href="#">Grb7</a>                                                                                                                                                                                                                                                                                                                                                                                                                                                                                                                                                                                                                                                                                                                                                                                                                                                                                                                                  | <a href="#">Downstream signal transduction</a>                                                |
| 8.8e-03                                                                                  | <a href="#">Itp2</a> , <a href="#">Prkar2b</a> , <a href="#">Itp1</a> , <a href="#">Gnb5</a>                                                                                                                                                                                                                                                                                                                                                                                                                                                                                                                                                                                                                                                                                                                                                                                                                                                                                                                                                                                  | <a href="#">Regulation of Insulin Secretion by Glucagon-like Peptide-1</a>                    |
| 9.4e-03                                                                                  | <a href="#">Fmo1</a> , <a href="#">Acss2</a> , <a href="#">Cyp2s1</a> , <a href="#">Adh1</a> , <a href="#">Maob</a>                                                                                                                                                                                                                                                                                                                                                                                                                                                                                                                                                                                                                                                                                                                                                                                                                                                                                                                                                           | <a href="#">Phase 1 - Functionalization of compounds</a>                                      |
| 9.4e-03                                                                                  | <a href="#">Smad7</a> , <a href="#">Smad6</a>                                                                                                                                                                                                                                                                                                                                                                                                                                                                                                                                                                                                                                                                                                                                                                                                                                                                                                                                                                                                                                 | <a href="#">I-Smad competes with R-Smad1/5/8 for type I receptor</a>                          |

**Table S3**, continued.

| <b>Biological pathways predicted to be coordinately regulated by passive SIgA and DSS</b>                 |                                                                                                                                                                                                                                                                                                                                            |                                                                                                                                       |
|-----------------------------------------------------------------------------------------------------------|--------------------------------------------------------------------------------------------------------------------------------------------------------------------------------------------------------------------------------------------------------------------------------------------------------------------------------------------|---------------------------------------------------------------------------------------------------------------------------------------|
| Statistical likelihood that the indicated pathway is regulated by passive SIgA and DSS ( <i>P</i> -value) | Genes that map to this pathway                                                                                                                                                                                                                                                                                                             | Name of this pathway                                                                                                                  |
| 1.3e-05                                                                                                   | <a href="#">Rpn1</a> , <a href="#">Ddost</a> , <a href="#">Rpn2</a>                                                                                                                                                                                                                                                                        | <a href="#">Transfer of N-glycan to the protein</a>                                                                                   |
| 1.6e-05                                                                                                   | <a href="#">Rpn1</a> , <a href="#">B3gnt3</a> , <a href="#">Alg9</a> , <a href="#">Cct6a</a> , <a href="#">Ddost</a> , <a href="#">Alg8</a> , <a href="#">Ssr3</a> , <a href="#">Pigu</a> , <a href="#">Spcs3</a> , <a href="#">Sec61a1</a> , <a href="#">Tuba1b</a> , <a href="#">Hspd1</a> , <a href="#">Rpn2</a> , <a href="#">Alg3</a> | <a href="#">Metabolism of proteins</a>                                                                                                |
| 9.0e-05                                                                                                   | <a href="#">Rpn1</a> , <a href="#">Alg9</a> , <a href="#">Ddost</a> , <a href="#">Alg8</a> , <a href="#">Rpn2</a> , <a href="#">Alg3</a>                                                                                                                                                                                                   | <a href="#">Asparagine N-linked glycosylation</a>                                                                                     |
| 1.7e-04                                                                                                   | <a href="#">Rpn1</a> , <a href="#">B3gnt3</a> , <a href="#">Alg9</a> , <a href="#">Ddost</a> , <a href="#">Alg8</a> , <a href="#">Pigu</a> , <a href="#">Rpn2</a> , <a href="#">Alg3</a>                                                                                                                                                   | <a href="#">Post-translational protein modification</a>                                                                               |
| 2.8e-04                                                                                                   | <a href="#">Spcs3</a> , <a href="#">Sec61a1</a> , <a href="#">Rpn1</a> , <a href="#">Ddost</a> , <a href="#">Ssr3</a> , <a href="#">Rpn2</a>                                                                                                                                                                                               | <a href="#">Signal peptide cleavage from ribosome-associated nascent protein</a>                                                      |
| 4.5e-04                                                                                                   | <a href="#">Spcs3</a> , <a href="#">Sec61a1</a> , <a href="#">Rpn1</a> , <a href="#">Ddost</a> , <a href="#">Ssr3</a> , <a href="#">Rpn2</a>                                                                                                                                                                                               | <a href="#">SRP-dependent cotranslational protein targeting to membrane</a>                                                           |
| 8.5e-04                                                                                                   | <a href="#">Psme3</a> , <a href="#">Ccnd1</a> , <a href="#">Psmb2</a> , <a href="#">Psm14</a>                                                                                                                                                                                                                                              | <a href="#">Proteasome mediated degradation of Cyclin D1</a>                                                                          |
| 9.2e-04                                                                                                   | <a href="#">Psme3</a> , <a href="#">Ccnd1</a> , <a href="#">Psmb2</a> , <a href="#">Psm14</a>                                                                                                                                                                                                                                              | <a href="#">Ubiquitin-dependent degradation of Cyclin D1</a>                                                                          |
| 9.2e-04                                                                                                   | <a href="#">Psme3</a> , <a href="#">Ccnd1</a> , <a href="#">Psmb2</a> , <a href="#">Psm14</a>                                                                                                                                                                                                                                              | <a href="#">Ubiquitin-dependent degradation of Cyclin D</a>                                                                           |
| 1.0e-03                                                                                                   | <a href="#">Psme3</a> , <a href="#">Ccnd1</a> , <a href="#">Psmb2</a> , <a href="#">Rrm2</a> , <a href="#">Psm14</a> , <a href="#">Lin54</a>                                                                                                                                                                                               | <a href="#">Mitotic G1-G1/S phases</a>                                                                                                |
| 1.1e-03                                                                                                   | <a href="#">Psme3</a> , <a href="#">Psmb2</a> , <a href="#">Chek1</a> , <a href="#">Psm14</a>                                                                                                                                                                                                                                              | <a href="#">Ubiquitin Mediated Degradation of Phosphorylated Cdc25A</a>                                                               |
| 1.1e-03                                                                                                   | <a href="#">Psme3</a> , <a href="#">Psmb2</a> , <a href="#">Chek1</a> , <a href="#">Psm14</a>                                                                                                                                                                                                                                              | <a href="#">p53-Independent DNA Damage Response</a>                                                                                   |
| 1.1e-03                                                                                                   | <a href="#">Psme3</a> , <a href="#">Psmb2</a> , <a href="#">Chek1</a> , <a href="#">Psm14</a>                                                                                                                                                                                                                                              | <a href="#">p53-Independent G1/S DNA damage checkpoint</a>                                                                            |
| 1.8e-03                                                                                                   | <a href="#">Psme3</a> , <a href="#">Psmb2</a> , <a href="#">Chek1</a> , <a href="#">Psm14</a>                                                                                                                                                                                                                                              | <a href="#">G1/S DNA Damage Checkpoints</a>                                                                                           |
| 2.0e-03                                                                                                   | <a href="#">Spcs3</a> , <a href="#">Sec61a1</a> , <a href="#">Rpn1</a> , <a href="#">Ddost</a> , <a href="#">Ssr3</a> , <a href="#">Rpn2</a>                                                                                                                                                                                               | <a href="#">Translation</a>                                                                                                           |
| 2.2e-03                                                                                                   | <a href="#">Alg9</a> , <a href="#">Alg8</a> , <a href="#">Alg3</a>                                                                                                                                                                                                                                                                         | <a href="#">Biosynthesis of the N-glycan precursor (dolichol lipid-linked oligosaccharide, LLO) and transfer to a nascent protein</a> |
| 2.6e-03                                                                                                   | <a href="#">Sec61a1</a> , <a href="#">Rpn1</a> , <a href="#">Ddost</a> , <a href="#">Ssr3</a> , <a href="#">Rpn2</a>                                                                                                                                                                                                                       | <a href="#">Translocation of signal-containing nascent peptide to Endoplasmic Reticulum</a>                                           |
| 4.8e-03                                                                                                   | <a href="#">Aaas</a> , <a href="#">Eno1</a> , <a href="#">Calm3</a> , <a href="#">Prps1</a> , <a href="#">Pklr</a>                                                                                                                                                                                                                         | <a href="#">Metabolism of carbohydrates</a>                                                                                           |
| 6.6e-03                                                                                                   | <a href="#">Psme3</a> , <a href="#">Psmb2</a> , <a href="#">Psm14</a>                                                                                                                                                                                                                                                                      | <a href="#">Proteasomal cleavage of exogenous antigen</a>                                                                             |
| 6.7e-03                                                                                                   | <a href="#">Psme3</a> , <a href="#">Psmb2</a> , <a href="#">Elavl1</a> , <a href="#">Psm14</a>                                                                                                                                                                                                                                             | <a href="#">Regulation of mRNA Stability by Proteins that Bind AU-rich Elements</a>                                                   |
| 7.1e-03                                                                                                   | <a href="#">Psme3</a> , <a href="#">Psmb2</a> , <a href="#">Psm14</a>                                                                                                                                                                                                                                                                      | <a href="#">Destruction of AUF1 and mRNA</a>                                                                                          |
| 7.4e-03                                                                                                   | <a href="#">Srm</a> , <a href="#">Mtap</a>                                                                                                                                                                                                                                                                                                 | <a href="#">Metabolism of polyamines</a>                                                                                              |
| 8.5e-03                                                                                                   | <a href="#">Psme3</a> , <a href="#">Psmb2</a> , <a href="#">Psm14</a>                                                                                                                                                                                                                                                                      | <a href="#">26S proteasome degrades ODC holoenzyme complex</a>                                                                        |
| 8.5e-03                                                                                                   | <a href="#">Psme3</a> , <a href="#">Psmb2</a> , <a href="#">Psm14</a>                                                                                                                                                                                                                                                                      | <a href="#">Proteasomal cleavage of substrate</a>                                                                                     |
| 8.5e-03                                                                                                   | <a href="#">Psme3</a> , <a href="#">Psmb2</a> , <a href="#">Psm14</a>                                                                                                                                                                                                                                                                      | <a href="#">Proteasomal cleavage of substrate</a>                                                                                     |
| 9.0e-03                                                                                                   | <a href="#">Psme3</a> , <a href="#">Psmb2</a> , <a href="#">Psm14</a>                                                                                                                                                                                                                                                                      | <a href="#">Ubiquitinated geminin is degraded by the proteasome</a>                                                                   |
| 9.0e-03                                                                                                   | <a href="#">Psme3</a> , <a href="#">Psmb2</a> , <a href="#">Psm14</a>                                                                                                                                                                                                                                                                      | <a href="#">Ubiquitinated Orc1 is degraded by the proteasome</a>                                                                      |
| 9.0e-03                                                                                                   | <a href="#">Psme3</a> , <a href="#">Psmb2</a> , <a href="#">Psm14</a>                                                                                                                                                                                                                                                                      | <a href="#">Ubiquitinated Cdc6 is degraded by the proteasome</a>                                                                      |
| 9.0e-03                                                                                                   | <a href="#">Psme3</a> , <a href="#">Psmb2</a> , <a href="#">Psm14</a>                                                                                                                                                                                                                                                                      | <a href="#">Proteolytic degradation of ubiquitinated-Cdc25A</a>                                                                       |
| 9.0e-03                                                                                                   | <a href="#">Psme3</a> , <a href="#">Psmb2</a> , <a href="#">Psm14</a>                                                                                                                                                                                                                                                                      | <a href="#">Proteasome mediated degradation of PAK-2p34</a>                                                                           |
| 9.0e-03                                                                                                   | <a href="#">Psme3</a> , <a href="#">Psmb2</a> , <a href="#">Psm14</a>                                                                                                                                                                                                                                                                      | <a href="#">Regulation of activated PAK-2p34 by proteasome mediated degradation</a>                                                   |
| 9.0e-03                                                                                                   | <a href="#">Psme3</a> , <a href="#">Psmb2</a> , <a href="#">Psm14</a>                                                                                                                                                                                                                                                                      | <a href="#">Proteasome mediated degradation of PAK-2p34</a>                                                                           |
| 9.0e-03                                                                                                   | <a href="#">Psme3</a> , <a href="#">Psmb2</a> , <a href="#">Psm14</a>                                                                                                                                                                                                                                                                      | <a href="#">Proteasome mediated degradation of COP1</a>                                                                               |
| 9.0e-03                                                                                                   | <a href="#">Psme3</a> , <a href="#">Psmb2</a> , <a href="#">Psm14</a>                                                                                                                                                                                                                                                                      | <a href="#">Cross-presentation of soluble exogenous antigens (endosomes)</a>                                                          |
| 9.5e-03                                                                                                   | <a href="#">Psme3</a> , <a href="#">Psmb2</a> , <a href="#">Psm14</a>                                                                                                                                                                                                                                                                      | <a href="#">CDK-mediated phosphorylation and removal of Cdc6</a>                                                                      |
| 9.5e-03                                                                                                   | <a href="#">Psme3</a> , <a href="#">Psmb2</a> , <a href="#">Psm14</a>                                                                                                                                                                                                                                                                      | <a href="#">Regulation of ornithine decarboxylase (ODC)</a>                                                                           |
| 9.5e-03                                                                                                   | <a href="#">Psme3</a> , <a href="#">Psmb2</a> , <a href="#">Psm14</a>                                                                                                                                                                                                                                                                      | <a href="#">Degradation of Ubiquitinated IκB (B cell)</a>                                                                             |
| 3.8e-04                                                                                                   | <a href="#">Foxo3</a> , <a href="#">Akt3</a>                                                                                                                                                                                                                                                                                               | <a href="#">AKT can phosphorylate forkhead box transcription factors</a>                                                              |
| 8.6e-04                                                                                                   | <a href="#">Irs2</a> , <a href="#">Foxo3</a> , <a href="#">Akt3</a>                                                                                                                                                                                                                                                                        | <a href="#">PI3K/AKT activation</a>                                                                                                   |
| 9.1e-04                                                                                                   | <a href="#">Foxo3</a> , <a href="#">Akt3</a>                                                                                                                                                                                                                                                                                               | <a href="#">AKT phosphorylates targets in the nucleus</a>                                                                             |
| 1.4e-03                                                                                                   | <a href="#">Foxo3</a> , <a href="#">Akt3</a> , <a href="#">ErbB3</a>                                                                                                                                                                                                                                                                       | <a href="#">PI3K events in ERBB2 signaling</a>                                                                                        |
| 1.9e-03                                                                                                   | <a href="#">Akt3</a> , <a href="#">ErbB3</a>                                                                                                                                                                                                                                                                                               | <a href="#">Downregulation of ERBB2:ERBB3 signaling</a>                                                                               |
| 2.2e-03                                                                                                   | <a href="#">Nr1d1</a> , <a href="#">Nr3c2</a> , <a href="#">Vdr</a>                                                                                                                                                                                                                                                                        | <a href="#">Formation of NR-MED1 Coactivator Complex</a>                                                                              |
| 2.2e-03                                                                                                   | <a href="#">Nr1d1</a> , <a href="#">Nr3c2</a> , <a href="#">Vdr</a>                                                                                                                                                                                                                                                                        | <a href="#">Nuclear Receptor transcription pathway</a>                                                                                |
| 2.3e-03                                                                                                   | <a href="#">Nr1d1</a> , <a href="#">Ccrn4l</a>                                                                                                                                                                                                                                                                                             | <a href="#">BMAL1:CLOCK/NPAS2 Activates Circadian Expression</a>                                                                      |
| 5.1e-03                                                                                                   | <a href="#">Irs2</a> , <a href="#">Foxo3</a> , <a href="#">Akt3</a> , <a href="#">Plekha5</a> , <a href="#">Kalrn</a>                                                                                                                                                                                                                      | <a href="#">Signalling by NGF</a>                                                                                                     |
| 9.0e-03                                                                                                   | <a href="#">Foxo3</a> , <a href="#">Akt3</a>                                                                                                                                                                                                                                                                                               | <a href="#">PIP3 activates AKT signaling</a>                                                                                          |

| <b>Biological pathways predicted to be coordinately regulated by active SIgA and DSS</b>                  |                                                                        |                                                                         |
|-----------------------------------------------------------------------------------------------------------|------------------------------------------------------------------------|-------------------------------------------------------------------------|
| Statistical likelihood that the indicated pathway is regulated by passive SIgA and DSS ( <i>P</i> -value) | Genes that map to this pathway                                         | Name of this pathway                                                    |
| 7.5e-03                                                                                                   | <a href="#">Agpat3</a> , <a href="#">Gpam</a>                          | <a href="#">Triglyceride Biosynthesis</a>                               |
| 9.1e-03                                                                                                   | <a href="#">Agpat3</a> , <a href="#">Gpam</a> , <a href="#">Ugt1a9</a> | <a href="#">Fatty acid, triacylglycerol, and ketone body metabolism</a> |

**Table S4.** Principal component analysis of microarray gene expression.

|                                  | PC1    | PC2    |
|----------------------------------|--------|--------|
| Contribution to overall variance | 55%    | 17%    |
| Eigenvalue                       | 642.98 | 195.69 |

**Scores for Principal Components (PCs):**

| Samples | Groups            | PC1    | PC2    |
|---------|-------------------|--------|--------|
| 1       | P=yes A=yes D=no  | -22.95 | -28.04 |
| 2       |                   | -23.37 | -33.70 |
| 3       | P=yes A=yes D=yes | 25.82  | -8.71  |
| 4       |                   | 32.41  | -5.00  |
| 5       | P=yes A=no D=no   | -19.65 | 1.53   |
| 6       |                   | -19.09 | 0.96   |
| 7       | P=yes A=no D=yes  | 29.89  | -3.05  |
| 8       |                   | 28.03  | 3.56   |
| 9       | P=no A=yes D=no   | -26.96 | 5.07   |
| 10      |                   | -24.74 | 11.23  |
| 11      | P=no A=yes D=yes  | 22.56  | 3.61   |
| 12      |                   | 18.81  | 5.46   |
| 13      | P=no A=no D=no    | -28.86 | 19.18  |
| 14      |                   | -27.58 | 15.82  |
| 15      | P=no A=no D=yes   | 17.82  | 4.53   |
| 16      |                   | 17.88  | 7.55   |

P = Passive SIgA

A = Active SIgA

D = DSS

---

Multifactorial principal component analysis (PCA) was conducted using expression levels of 1,130 genes identified by microarray analysis to be significantly regulated by passive SIgA, active SIgA and/or DSS ( $P < 0.01$ ) (see **Fig. S7** for experimental design and **Table S1** for a list of regulated genes). Each sample represents pooled RNA from 3 mice, for a total of 6 mice/treatment group. **A**, Data for mRNA transcript levels from individual samples were reduced to two principal components (PC1 and PC2) that accounted for 72% of the overall variance in gene expression. PC1 and PC2 scores were calculated as the sum of normalized expression levels for each gene multiplied by weighted coefficients for that gene for PC1 and PC2.

A

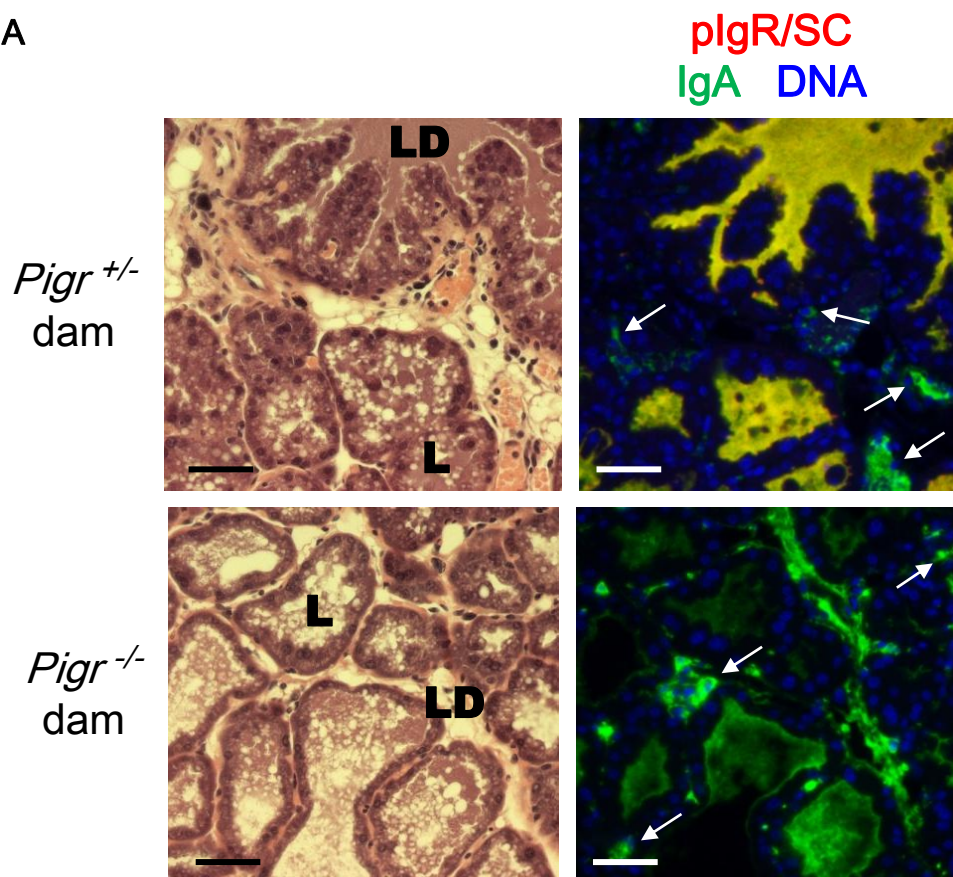

B

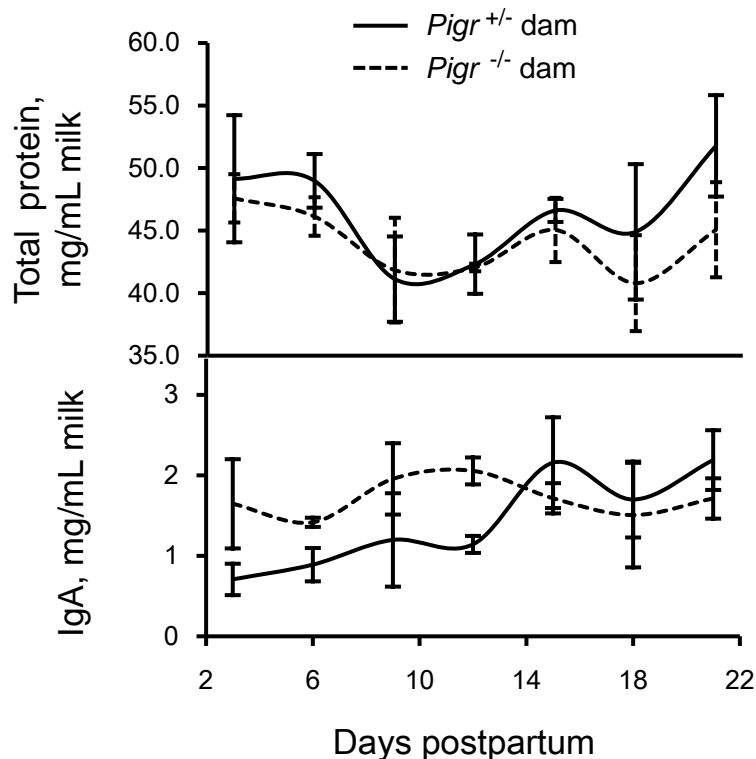

C

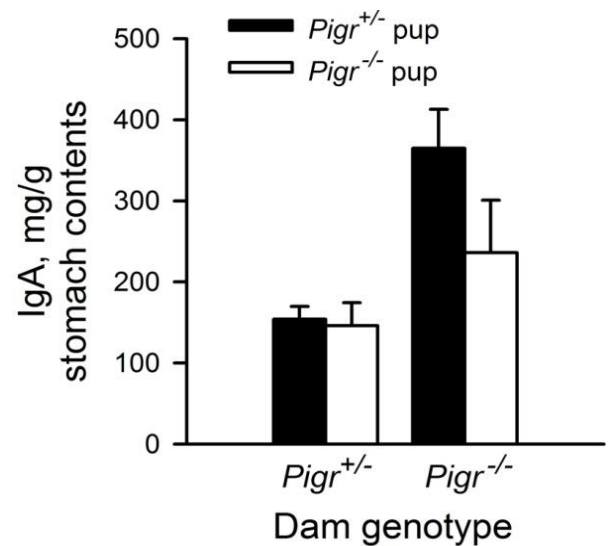

ANOVA:

|                          |              |
|--------------------------|--------------|
| Dam <i>Pigr</i> genotype | $P = 0.0045$ |
| Pup <i>Pigr</i> genotype | N.S.         |

**Figure S1.** Localization of IgA in the mammary glands of lactating *Pigr*<sup>+/-</sup> and *Pigr*<sup>-/-</sup> mice, and transit of IgA from milk to the stomach of suckling pups. **A.** Serial sections of mammary tissue stained with hematoxylin and eosin or labeled by immunofluorescence for pIgR/SC (red), IgA (green) and nuclei (blue). L, lobule; LD, lactiferous duct. White arrows in immunofluorescence images indicate clusters of IgA-secreting plasma cells. Scale bar = 50  $\mu$ m. **B.** Total protein and IgA content of milk from *Pigr*<sup>+/-</sup> and *Pigr*<sup>-/-</sup> dams (mean  $\pm$  SEM,  $n = 4$ ). Effects of maternal *Pigr* genotype were not significant ( $P > 0.05$ ). **C.** IgA levels of stomach contents of 10 day-old *Pigr*<sup>+/-</sup> and *Pigr*<sup>-/-</sup> neonates of different *Pigr* genotypes from *Pigr*<sup>+/-</sup> and *Pigr*<sup>-/-</sup> dams (mean  $\pm$  SEM,  $n = 6$ ). Significant effects of dam and pup *Pigr* genotype were determined by 2-way ANOVA. N.S., not significant ( $P > 0.05$ ).

**Figure S2**

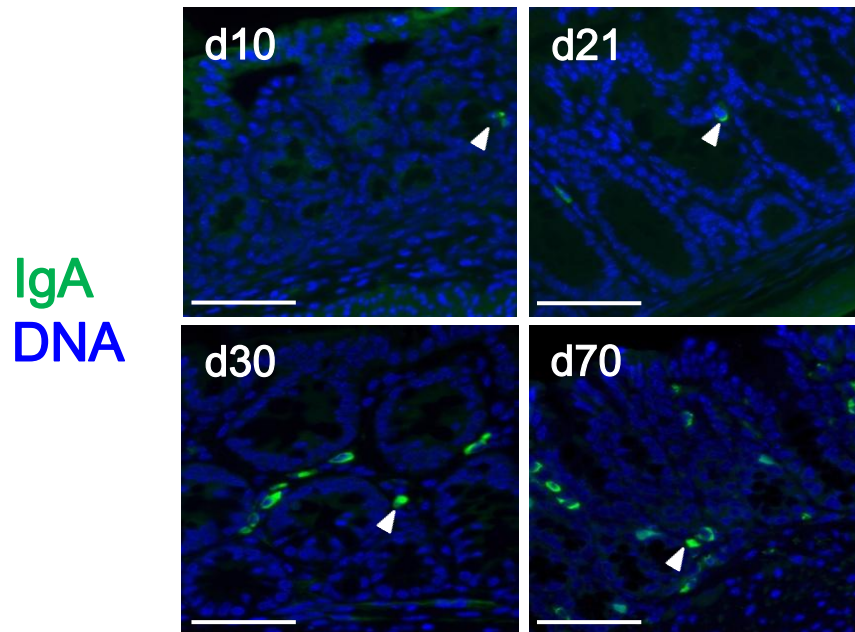

**Figure S2.** Numbers of IgA-secreting plasma cells in the colon increase as mice age. Sections of colon tissue from mice at the indicated ages were labeled by immunofluorescence for IgA (green) and nuclei (blue). Scale bar = 50  $\mu$ m. Arrowheads indicate individual IgA<sup>+</sup> plasma cells. Images shown are from representative mice.



Figure S3

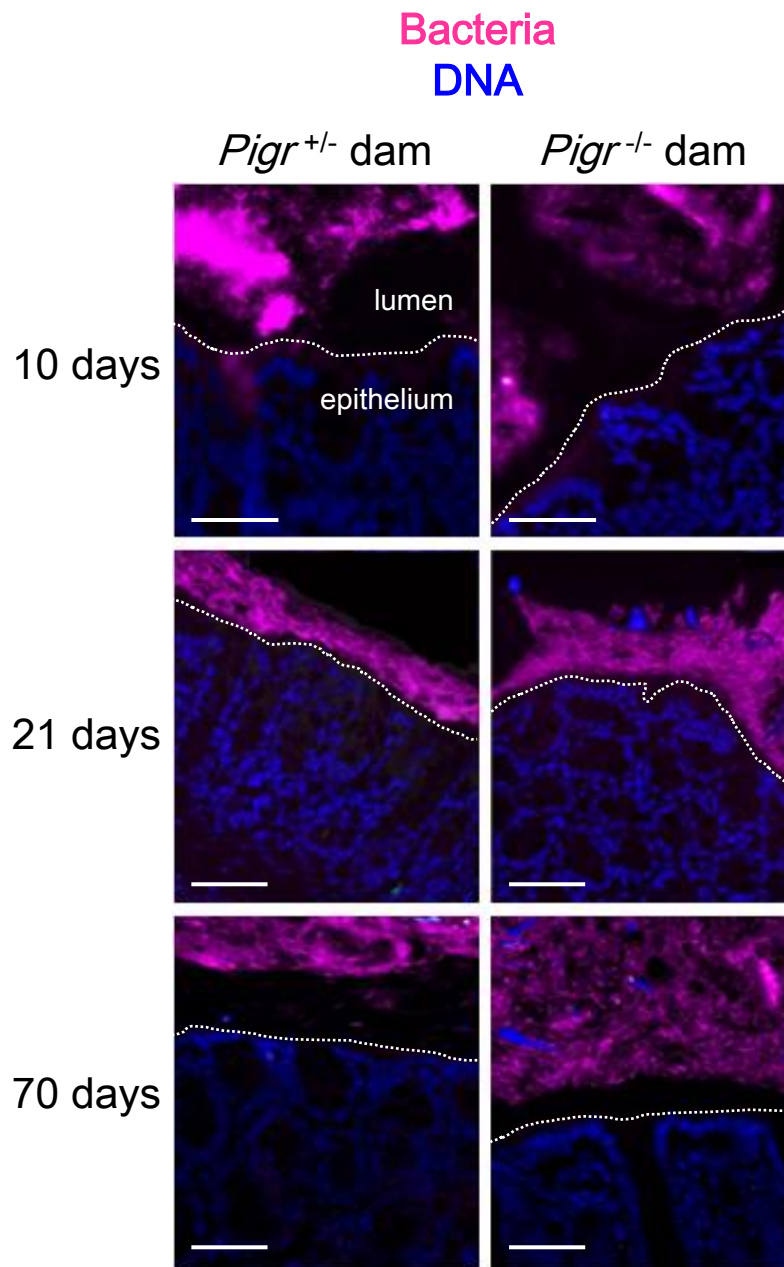

**Figure S3.** Localization of intestinal bacteria with respect to the epithelial surface changes with age. Segments of colon tissue from neonatal (10 days), weanling (21 days) and adult (70 days) offspring of *Pigr*<sup>+/-</sup> and *Pigr*<sup>-/-</sup> mice were treated with Carnoy's fixative to preserve the mucus layer. Sections of fixed tissue were labeled with fluorescent probes for bacterial 16S rRNA (magenta) and DNA (blue). White dotted lines denote the boundary between the epithelial surface and the colonic lumen. Scale bar = 50  $\mu$ m.

## Figure S4

A

*Ochrobactrum anthropi* ATCC 49188 chromosome 2, complete sequence

Sequence ID: gb|CP000759.1 Length: 1895911 Number of Matches: 1

| <u>Score</u>  | <u>Expect</u> | <u>Identities</u> | <u>Gaps</u>  | <u>Strand</u> |
|---------------|---------------|-------------------|--------------|---------------|
| 329 bits(364) | 4e-87         | 187/189 (99.8%)   | 1/189 (0.5%) | Plus/Plus     |

|                    |        |                                                                |
|--------------------|--------|----------------------------------------------------------------|
| MLN clone 16S rRNA | 1      | GGCGTAAGGTTTCAGGGCGCGCGCTGCTTCCCATTGTCCGCGCGGAATGGCCTCTATACCT  |
|                    |        |                                                                |
| <i>O. anthropi</i> | 822431 | GGCGTAAGGTTTCAGGGCGCGCGCTGCTTCCCATTGTCCGCGCGGAATGGCCTCTATACCT  |
| MLN clone 16S rRNA | 61     | CCGCGGTAAACCTCCGACGTATAGGCCGAATATTGAAGGCCAAGCGCCAGAGCGCCGGTC   |
|                    |        |                                                                |
| <i>O. anthropi</i> | 822491 | CCGCGGTAAACCTCCGACGTATAGGCCGAATATTGAAGGCCAAGCGCCAGAGCGCCGGTC   |
| MLN clone 16S rRNA | 121    | AGGAATGCGGGCAGAACAAATGCCATAGACAGGCAGCACGTAATACAGGAAAAACAAGTGT  |
|                    |        |                                                                |
| <i>O. anthropi</i> | 822551 | AGGAATGCGGGCAGAACAAATGCCATAGGACAGGCAGCACGTAATACAGGAAAAACAAGTGT |
| MLN clone 16S rRNA | 181    | A-CAGCAGC                                                      |
|                    |        |                                                                |
| <i>O. anthropi</i> | 822611 | ACCAGCAGC                                                      |

B Relative abundance of bacteria of the genus *Ochrobactrum* in offspring fecal microbiota

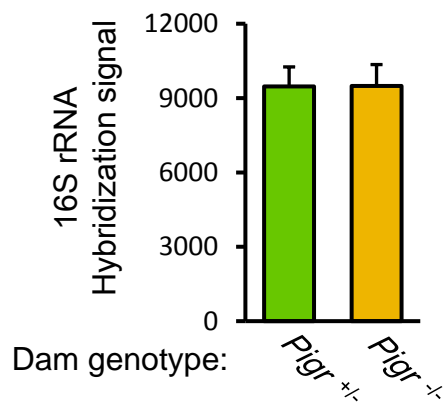

**Figure S4.** Identification of *Ochrobactrum anthropi* in the mesenteric lymph nodes (MLNs) of weanling offspring of *Pigr*<sup>-/-</sup> dams. **A.** The 16S rRNA gene was amplified, using universal primers, from a representative bacterial colony of the predominant type isolated from MLNs of 21 day-old *Pigr*<sup>+/-</sup> offspring of *Pigr*<sup>-/-</sup> dams (see **Fig. 2B** in the main text). The BLAST alignment compares the 16S rRNA sequence from the MLN clone to the genomic sequence of *Ochrobactrum anthropi* from the NCBI bacterial database. Red letters indicate mismatches or gaps in the alignment. **B.** Relative abundance of bacteria of the genus *Ochrobactrum* in fecal samples from 21 day-old *Pigr*<sup>+/-</sup> offspring of *Pigr*<sup>+/-</sup> and *Pigr*<sup>-/-</sup> dams. Bacterial abundance was determined by PhyloChip™ hybridization of the 16S rRNA gene from fecal DNA samples. Data represent mean ± SEM (n = 5). No significant differences were observed between groups in the abundance of fecal *O. anthropi*.

Figure S5

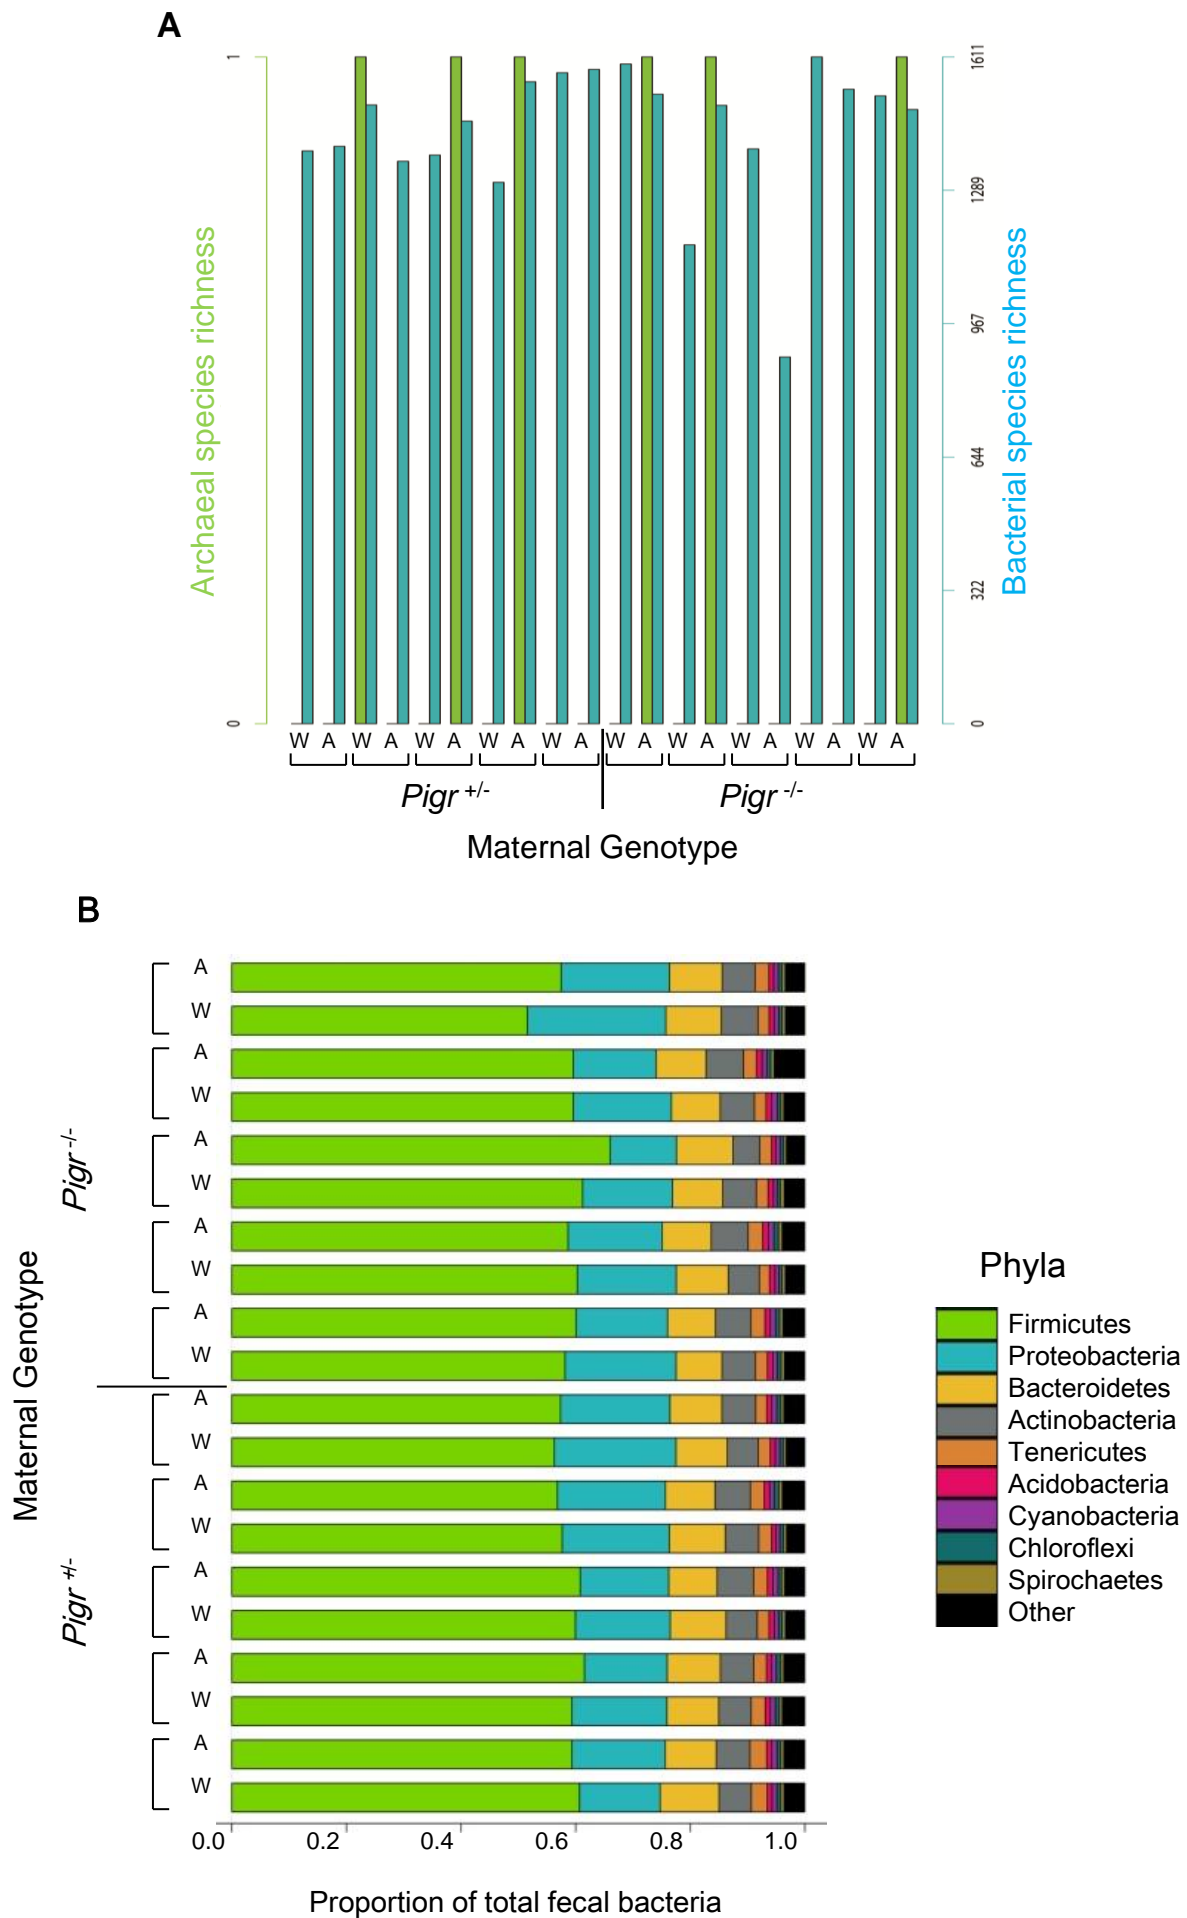

Figure S5, continued

C

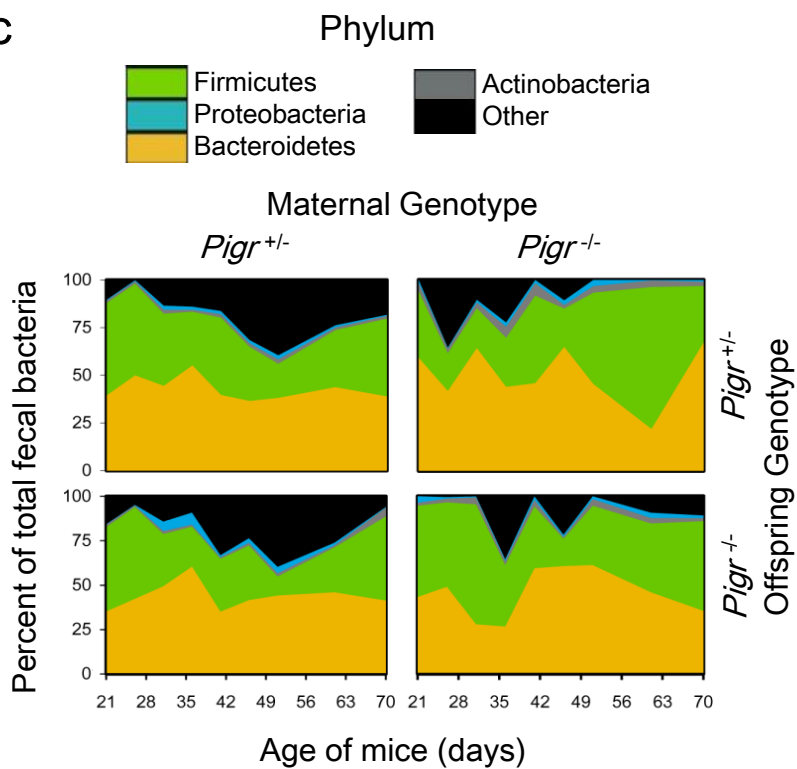

D

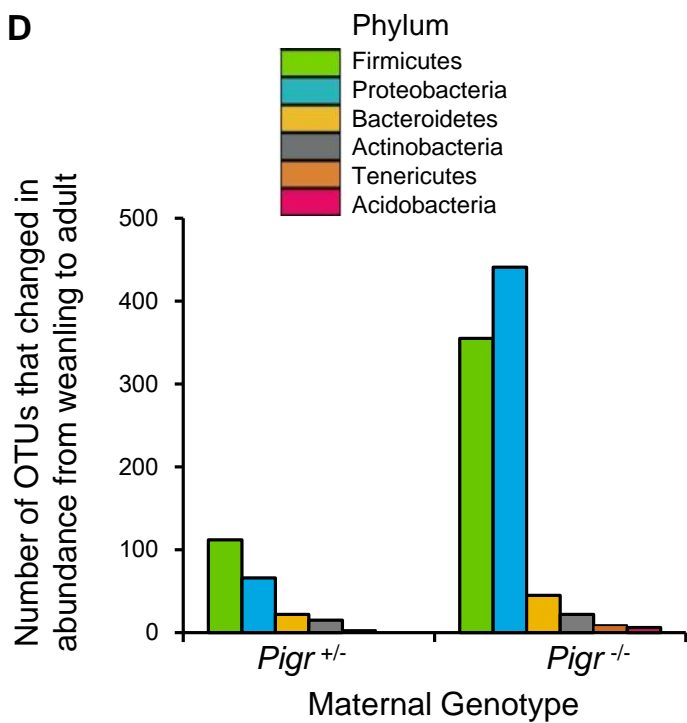

E

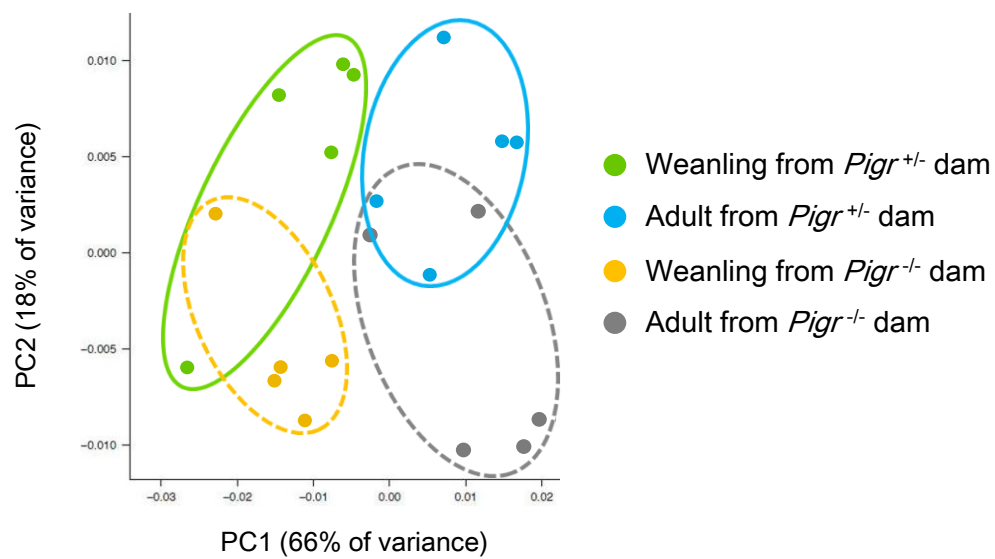

F

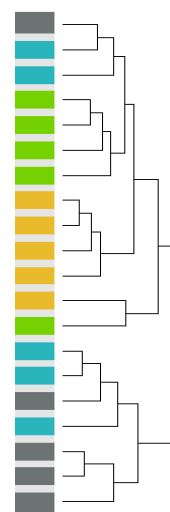

## Figure S5, continued

**Figure S5.** Changes in offspring bacterial abundance and diversity with age. **A.** Archaeal and bacterial taxon richness at the species level. Paired stool samples were collected from the same mice at 21 days (weaning, W) and 70 days (adult, A) of age, and numbers of unique operational taxonomic units (OTUs) were detected by PhyloChip™ analysis of microbial 16S rDNA. **B.** Change in the relative abundance of different phyla of fecal bacteria with age in individual mice. The abundance of unique taxa was detected in paired stool samples as described for panel B, and grouped by phylum. **C.** Change in the relative abundance of the dominant phyla of fecal bacteria with age, measured by real-time PCR using phylum-specific primers (mean,  $n = 6$ ). **D.** Change in abundance of bacterial taxa from weaning (21 days) to adulthood (70 days). The abundance of unique taxa was detected in paired stool samples as described for panel B. Bars indicate the number of OTUs within the designated phyla which exhibited highly significant changes in abundance with age ( $P < 0.01$ ). **E.** Principal coordinate analysis (PCoA) was used to generate two-dimensional ordination plots based on relative abundance (weighted Unifrac distances) of operational taxonomic units (OTUs) detected by PhyloChip™ analysis of microbial 16S rDNA in paired fecal samples from weanling and adult mice. **F.** Hierarchical clustering (average linkage) of the fecal microbiota, based on weighted Unifrac distance between samples in the abundance of 1684 taxa with significant differences across at least one of the categories (age or maternal *Pigr* genotype). It should be noted that the data in panels **E** and **F** are based on abundance of individual OTUs in individual samples (weighted Unifrac distance), whereas the data in **Fig. 3B** and **Fig. 3C** of the main article are based on the presence or absence of individual taxa (unweighted Unifrac distance).

**Figure S6**

**A**

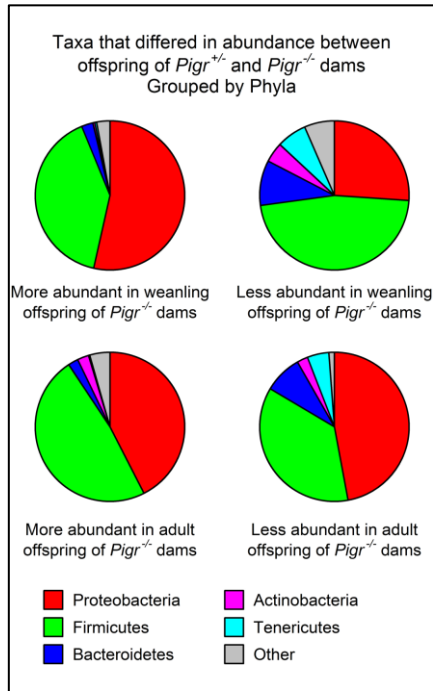

**B**

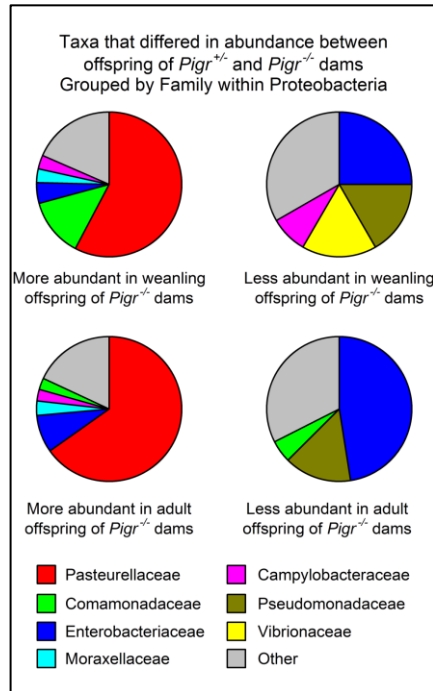

**C**

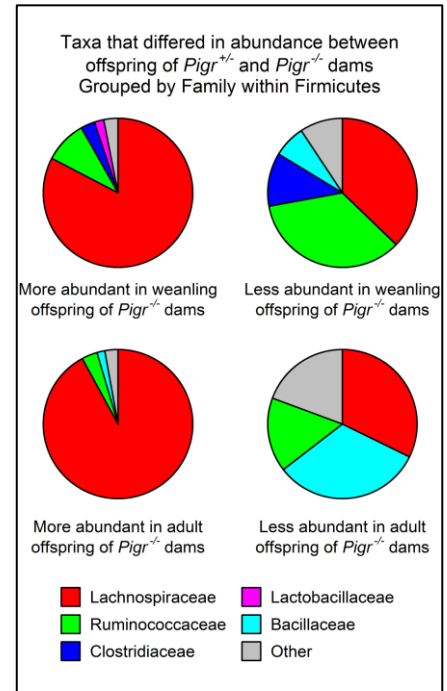

**D**

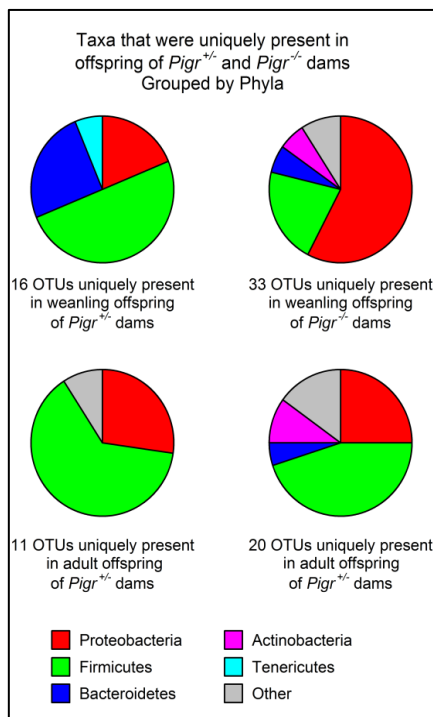

**E**

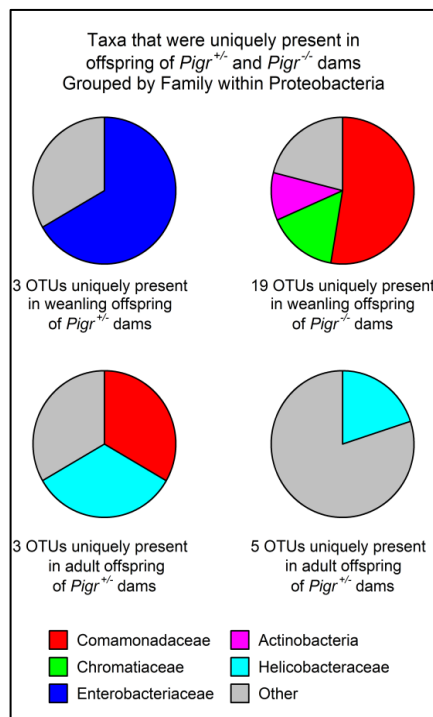

**F**

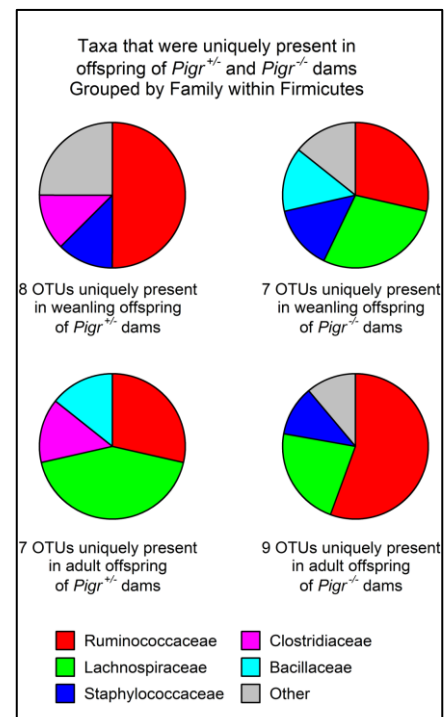

## Figure S6, continued

**Figure S6.** Phylogenetic distribution of bacterial taxa that were altered in presence or abundance by early exposure to passive SIgA in breast milk. Paired stool samples were collected from *Pigr*<sup>+/-</sup> mice at 21 days of age (weanling) and from the same mice at 70 days of age (adult). Offspring of *Pigr*<sup>+/-</sup> dams received passive SIgA in breast milk, whereas offspring of *Pigr*<sup>-/-</sup> dams did not receive passive SIgA in breast milk (5 mice/group). Bacterial taxa were identified by PhyloChip™ analysis of microbial 16S rDNA. Operational taxonomic units (OTUs) are defined as bacterial taxa that share > 99% sequence identity of the 16S rRNA gene. **A-C**, Relative abundance of bacterial taxa was determined by weighted Unifrac distances. 1684 OTUs were identified with significant abundance differences across at least one of the categories (maternal *Pigr* genotype and/or age) ( $p < 0.05$ ). OTUs were classified based on whether their abundance was up- or down-regulated in offspring of *Pigr*<sup>-/-</sup> dams relative to offspring of *Pigr*<sup>+/-</sup> dams. Charts in panel **A** illustrate the distribution of these taxa by bacterial phyla for each category, charts in panel **B** illustrate the distribution of taxa by family within the phylum Proteobacteria, and charts in panel **C** illustrate the distribution of taxa by family within the phylum Firmicutes. **D-F**, The presence or absence of bacterial taxa was determined by unweighted Unifrac distances. 80 OTUs were identified that were present in the majority of mice in one of the categories (maternal *Pigr* genotype and/or age) and absent in all other categories. Charts in panel **D** illustrate the distribution of these unique taxa by bacterial phyla for each category, charts in panel **E** illustrate the distribution of unique taxa by family within the phylum Proteobacteria, and charts in panel **F** illustrate the distribution of unique taxa by family within the phylum Firmicutes.

**Figure S7**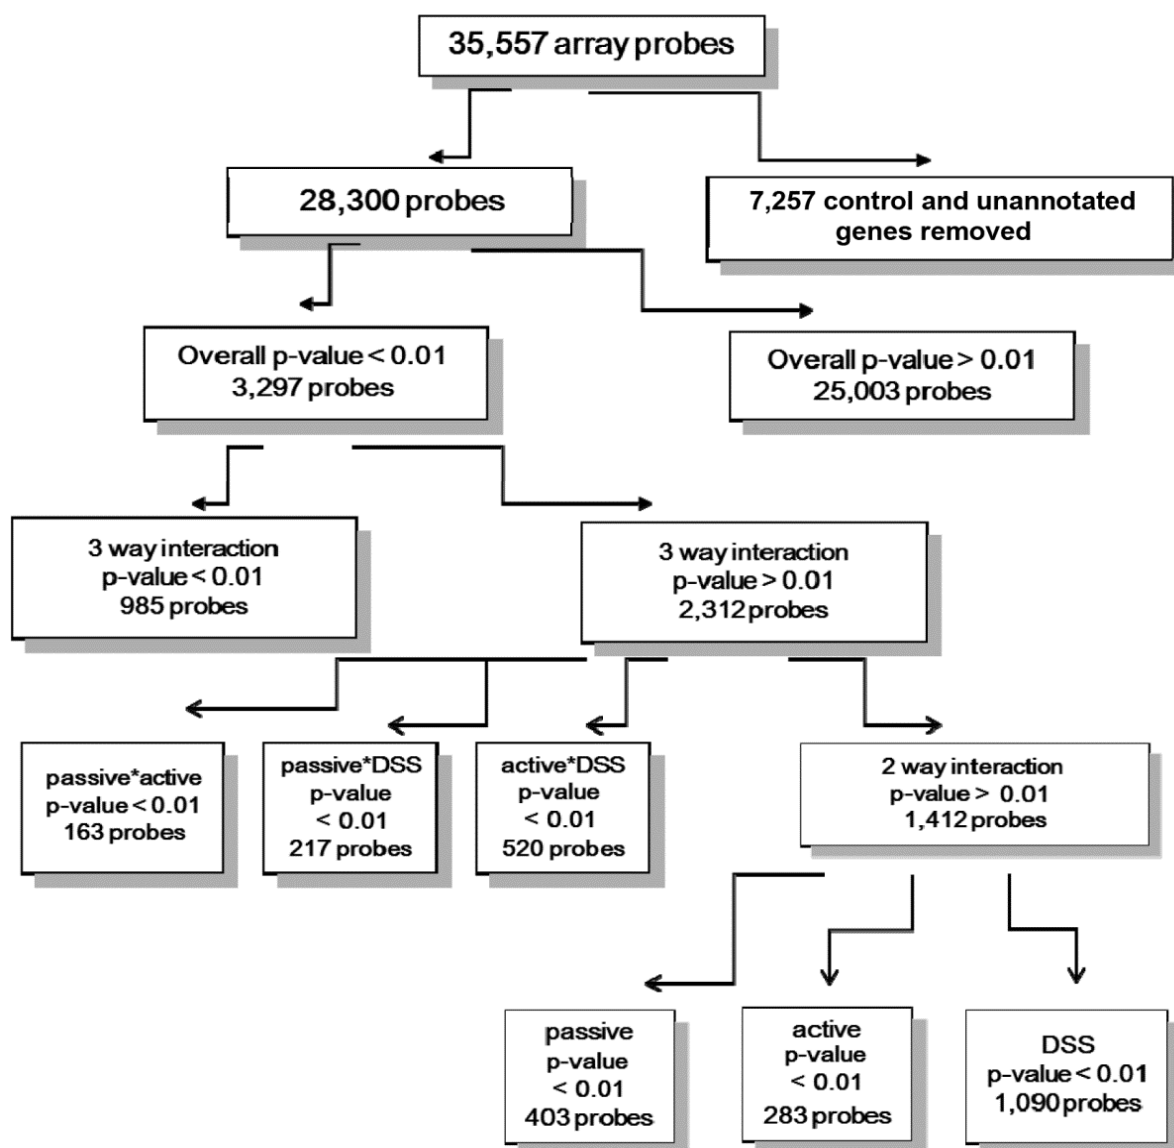

**Figure S7.** Three-way ANOVA of microarray gene expression data from colonic epithelial cells. Adult *Pigr*<sup>+/-</sup> and *Pigr*<sup>-/-</sup> offspring from *Pigr*<sup>+/-</sup> and *Pigr*<sup>-/-</sup> dams were given plain drinking water or 2% DSS in water for 8 days (6 mice/group). RNA was purified from isolated colonic epithelial cells and pooled into two samples for each treatment group (3 mice/sample). Gene expression was analyzed using the Affymetrix GeneChip Mouse Gene 1.0 ST array. Normalized data were analyzed by 3-way ANOVA for main effects of passive SIgA (maternal *Pigr*<sup>+/-</sup> or *Pigr*<sup>-/-</sup> genotype), active SIgA (offspring *Pigr*<sup>+/-</sup> or *Pigr*<sup>-/-</sup> genotype) and DSS treatment. Probes were discarded from the analysis when significant statistical interactions were observed between main effects, because of potential interference with the analysis of main effects. Following identification of probes that were significantly regulated by one or more of the main factors, the list was edited to remove probes for which a corresponding mouse gene has not been annotated, and to combine multiple probes that recognize different regions of the same gene. The edited list of regulated genes is shown in **Table S1**. Expression of some genes was significantly affected by more than one factor (passive SIgA, active SIgA and/or DSS).



Figure S8

### A. Biological pathway predicted to be down-regulated by early exposure to passive SIgA in breast milk

#### Pathway Hierarchy:

Nonsense-Mediated Decay Enhanced by the Exon Junction Complex

→ Phosphorylated UPF1 recruits SMG5, SMG7, SMG6, and PP2A

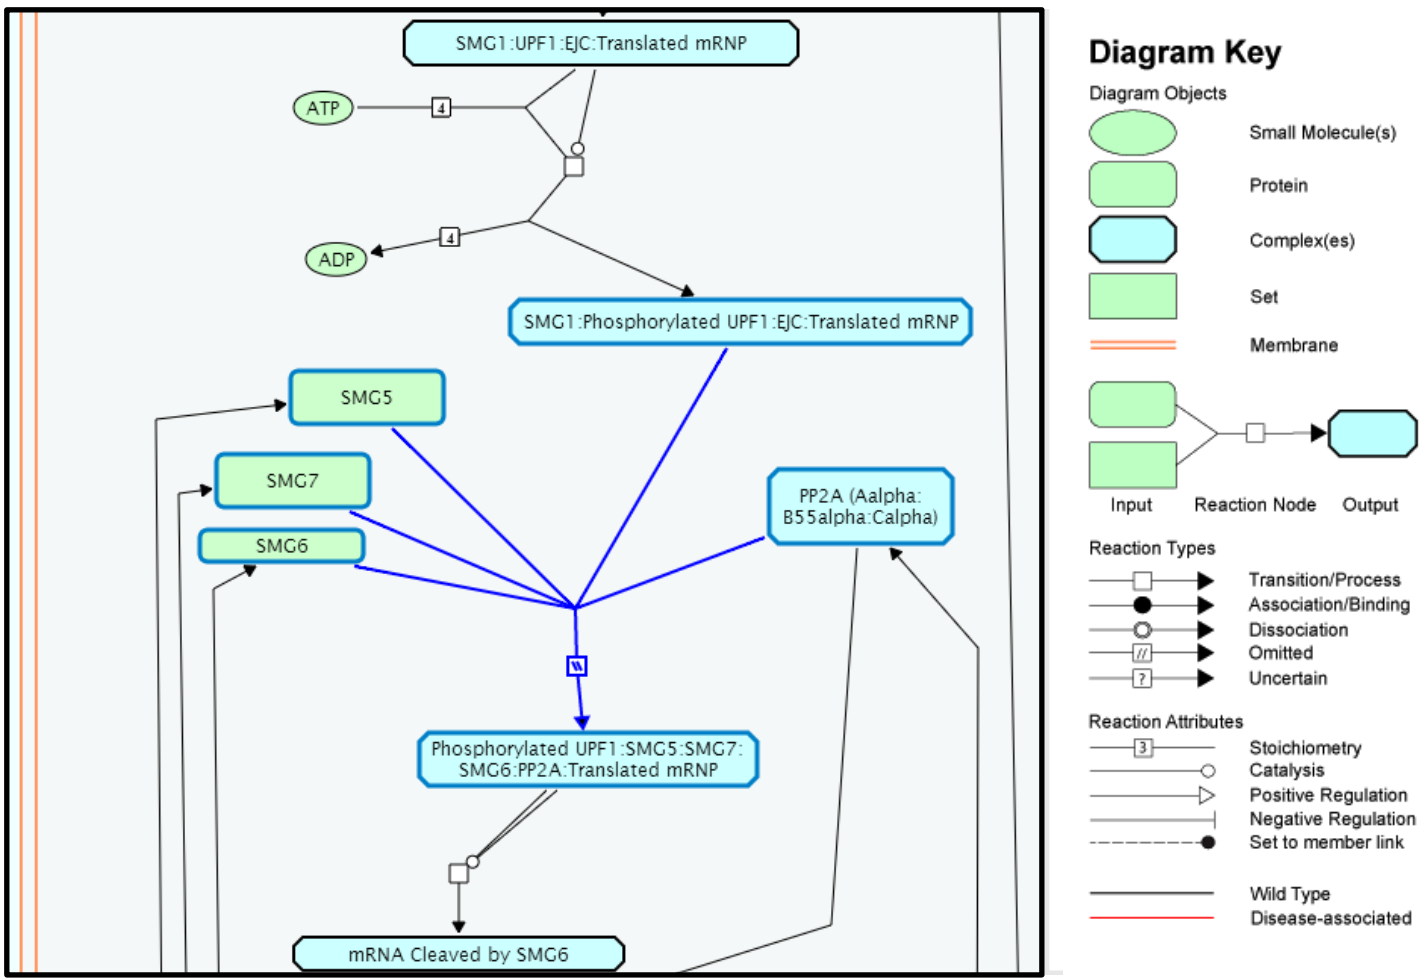

Figure S8, continued

**B. Biological pathway predicted to be up-regulated by active SIgA derived from endogenous transport**

**Pathway Hierarchy:**

Olfactory Signaling Pathway

→ Olfactory Receptor – G protein olfactory trimer complex formation

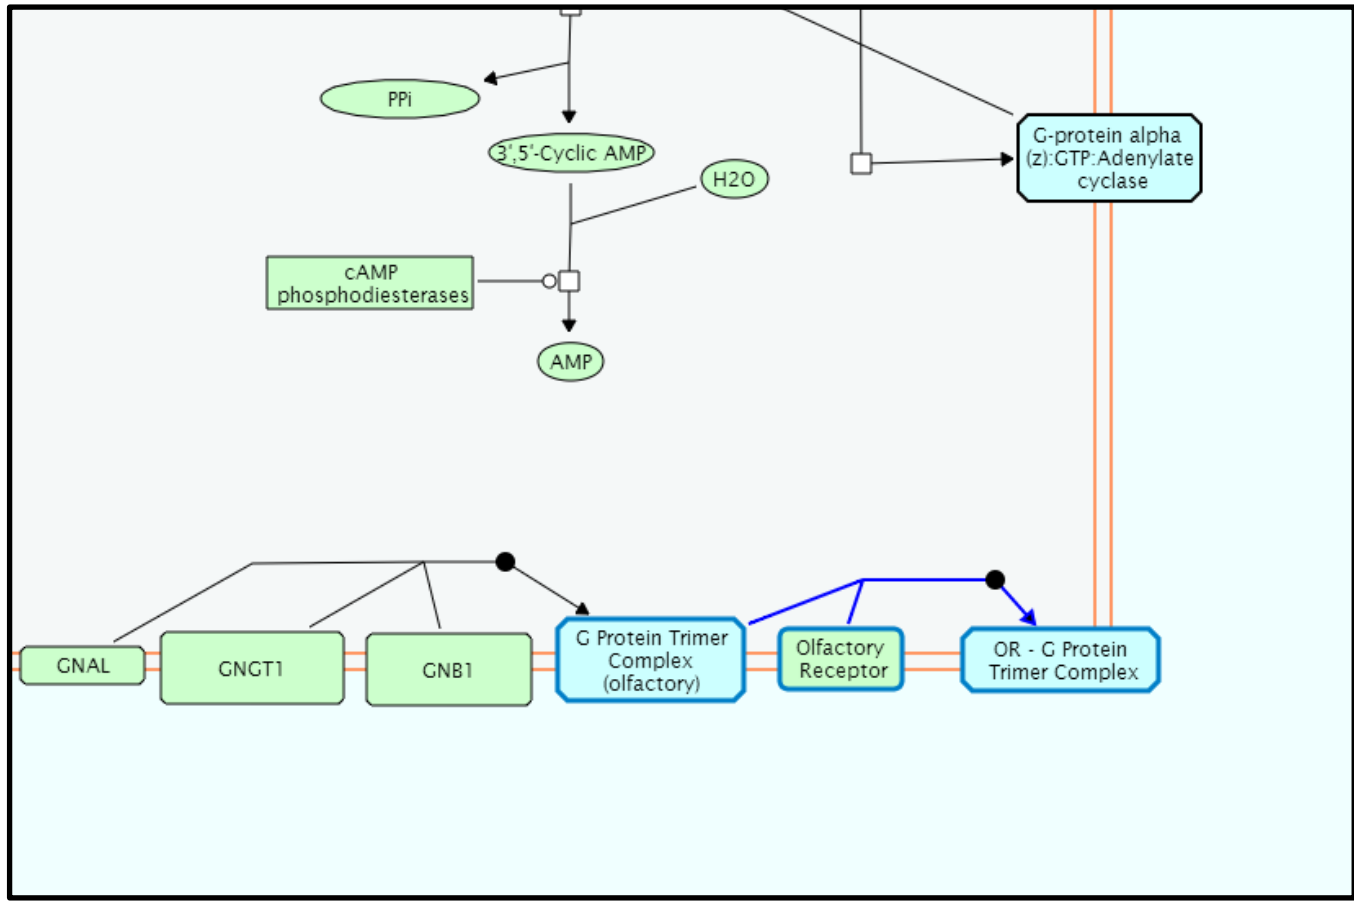

## Figure S8, continued

**Figure S8. Representative biological pathways predicted by gene expression patterns to be regulated by passive or active SIgA in colonic epithelial cells from adult mice.** Biological pathways associated with representative genes from **Table S3** were accessed by selecting the designated hyperlink for that pathway. These hyperlinks direct the user to the website <http://www.reactome.org/PathwayBrowser>, in which interactive graphs of biological pathways are displayed. In the pathways illustrated in panels **A** and **B**, specific segments influenced by passive or active SIgA are highlighted in blue. Two representative pathways are shown here, but any of the pathways listed in **Table S3** can be seen in graphical form by selecting the indicated hyperlink. **A**, The nonsense-mediated decay pathway for RNA degradation is predicted to be regulated by early exposure to passive SIgA.

**Figure S9**

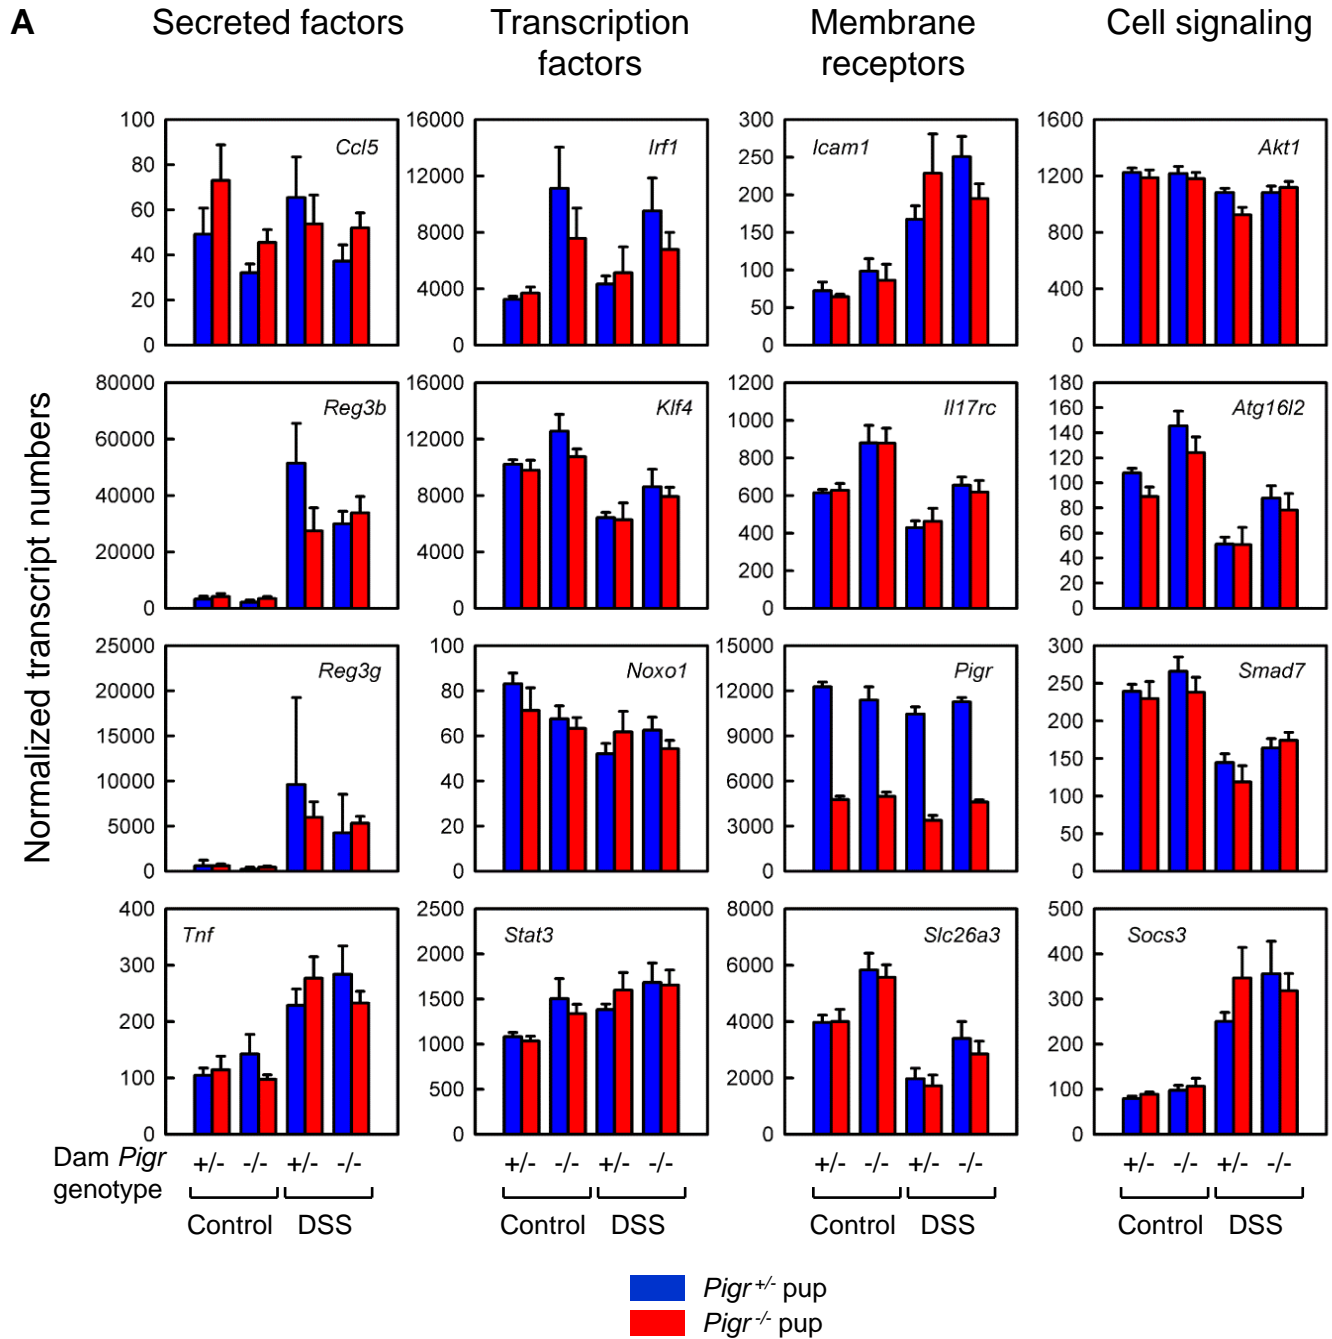

**Figure S9**, continued**B**

| Factor                                  | P-Value      |              |                |                |
|-----------------------------------------|--------------|--------------|----------------|----------------|
|                                         | <i>Ccl5</i>  | <i>Irf1</i>  | <i>Icam1</i>   | <i>Akt1</i>    |
| Dam <i>Pigr</i> genotype (passive SIgA) | 0.0242       | 0.0005       | 0.2697         | 0.1720         |
| Pup <i>Pigr</i> genotype (active SIgA)  | 0.2117       | 0.3111       | 0.8739         | 0.1324         |
| DSS                                     | 0.7902       | 0.9775       | < 0.0001       | < 0.0001       |
|                                         | <i>Reg3b</i> | <i>Klf4</i>  | <i>Il17rc</i>  | <i>Atg16l2</i> |
| Dam <i>Pigr</i> genotype (passive SIgA) | 0.3532       | 0.0055       | < 0.0001       | < 0.0001       |
| Pup <i>Pigr</i> genotype (active SIgA)  | 0.3278       | 0.2122       | 0.9660         | 0.0944         |
| DSS                                     | < 0.0001     | < 0.0001     | < 0.0001       | < 0.0001       |
|                                         | <i>Reg3g</i> | <i>Noxo1</i> | <i>Pigr</i>    | <i>Smad7</i>   |
| Dam <i>Pigr</i> genotype (passive SIgA) | 0.0619       | 0.2625       | 0.2698         | 0.0264         |
| Pup <i>Pigr</i> genotype (active SIgA)  | 0.4963       | 0.4298       | < 0.0001       | 0.2665         |
| DSS                                     | < 0.0001     | 0.0043       | 0.0038         | < 0.0001       |
|                                         | <i>Tnf</i>   | <i>Stat3</i> | <i>Slc26a3</i> | <i>Socs3</i>   |
| Dam <i>Pigr</i> genotype (passive SIgA) | 0.7156       | 0.0163       | < 0.0001       | 0.3128         |
| Pup <i>Pigr</i> genotype (active SIgA)  | 0.6565       | 0.9462       | 0.4244         | 0.4866         |
| DSS                                     | < 0.0001     | 0.0029       | < 0.0001       | < 0.0001       |

**Figure S9.** Validation of selected genes by Nanostring nCounter™ gene expression analysis. The relative expression of each gene was determined as described in Supplemental Methods, using RNA from individual mice from the experiment described in **Figure S7**. **A**, Graphical representation of gene expression. Data are expressed as mean  $\pm$  SEM (n = 6). **B**, Three-way ANOVA of gene expression data from individual mice.

Figure S10

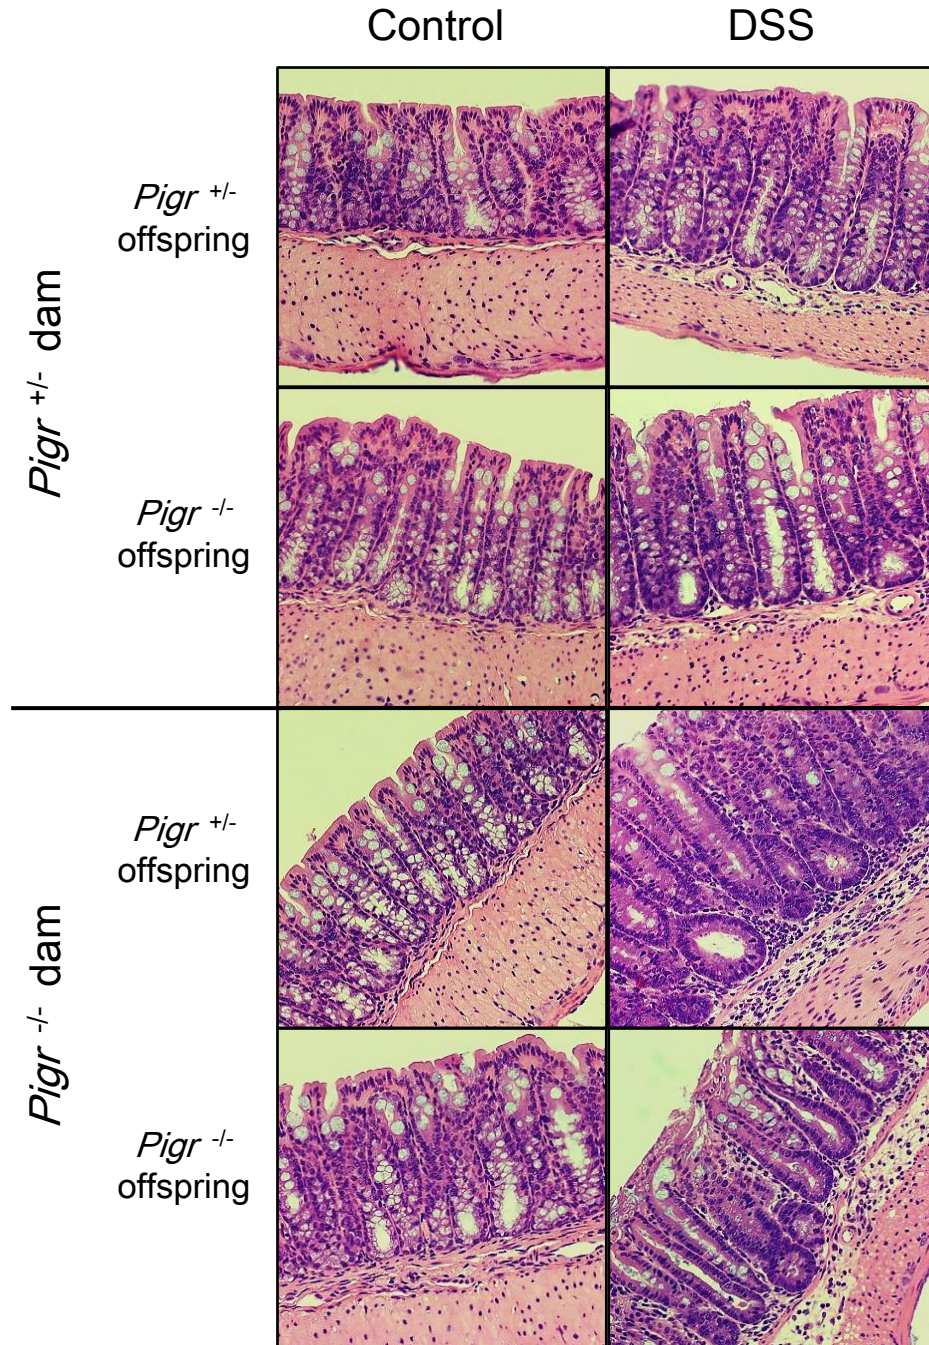

**Figure S10.** Effect of oral DSS administration on colon histology. Adult *Pigr*<sup>+/-</sup> and *Pigr*<sup>-/-</sup> offspring from *Pigr*<sup>+/-</sup> and *Pigr*<sup>-/-</sup> dams were given plain drinking water or 2% DSS in water for 8 days. Colons were removed, fixed in formalin, sectioned, and stained with hematoxylin and eosin. Images from representative mice from each treatment group are shown.
